# Supplementary material for: Exchange-driven slow relaxation of magnetization in NiII2LnIII2 (LnIII = Y, Gd, Tb and Dy) butterfly complexes: experimental and theoretical studies
Source: Royal Society of Chemistry journal article supplement (doi:10.1039/d2dt00237j), 2022-01-01
Supplement: d2dt00237j1.pdf [file d2dt00237j1.pdf]

# Supporting Information

## Exchange-Driven Slow Relaxation of Magnetization in $\text{Ni}^{\text{II}}\text{Ln}^{\text{III}}_2$ ( $\text{Ln}^{\text{III}} = \text{Y}, \text{Gd}, \text{Tb}$ and $\text{Dy}$ )

### Butterfly complexes: Experimental and Theoretical Studies

Amit Chakraborty,\*<sup>a, b †</sup> Naushad Ahmed,<sup>a †</sup> Shruti Moorthy<sup>c</sup>, Joydeb Goura,<sup>d</sup> Saurabh Kumar Singh\*  
<sup>c</sup>, Guillaume Rogez\*<sup>d</sup>, Vadapalli Chandrasekhar\*<sup>a d</sup>

<sup>a</sup> *Tata Institute of Fundamental Research, 36/P, Gopanpally Village, Serilingampally Mandal, Ranga Reddy District, Hyderabad 500046.*

<sup>b</sup> *Department of Chemistry, Inorganic Chemistry Section, Jadavpur University, Kolkata 700032, India.*

<sup>c</sup> *Department of Chemistry, Indian Institute of Technology Hyderabad, Kandi-502285, Sangareddy, Telangana, India.*

<sup>d</sup> *Department of Chemistry, IIT Kanpur, Kanpur 208016, India.*

<sup>e</sup> *Institut de Physique et Chimie des Matériaux de Strasbourg, UMR 7504 CNRS-Université de Strasbourg, 23 rue du Loess, B.P. 43, 67034 Strasbourg Cedex 2, France*

# Supporting Information

**Table S1.** Crystallographic parameters for complexes **1-4**.

| Compound                              | 1                                                                                             | 2                                                                                              | 3                                                                                              | 4                                                                                              |
|---------------------------------------|-----------------------------------------------------------------------------------------------|------------------------------------------------------------------------------------------------|------------------------------------------------------------------------------------------------|------------------------------------------------------------------------------------------------|
| CCDC Number                           | 2120514                                                                                       | 2120087                                                                                        | 2120513                                                                                        | 2120086                                                                                        |
| Empirical formula                     | C <sub>54</sub> H <sub>56</sub> N <sub>6</sub> Ni <sub>2</sub> O <sub>18</sub> Y <sub>2</sub> | C <sub>54</sub> H <sub>56</sub> Gd <sub>2</sub> N <sub>6</sub> Ni <sub>2</sub> O <sub>18</sub> | C <sub>54</sub> H <sub>56</sub> N <sub>6</sub> Ni <sub>2</sub> O <sub>18</sub> Tb <sub>2</sub> | C <sub>54</sub> H <sub>56</sub> Dy <sub>2</sub> N <sub>6</sub> Ni <sub>2</sub> O <sub>18</sub> |
| Formula weight (g mol <sup>-1</sup> ) | 1372.25                                                                                       | 1508.93                                                                                        | 1512.29                                                                                        | 1519.43                                                                                        |
| Temperature (K)                       | 100(2)                                                                                        | 100(2)                                                                                         | 100(2)                                                                                         | 100 (2)                                                                                        |
| Crystal system                        | orthorhombic                                                                                  | orthorhombic                                                                                   | orthorhombic                                                                                   | orthorhombic                                                                                   |
| Space group                           | Pbcn                                                                                          | Pbcn                                                                                           | Pbcn                                                                                           | Pbcn                                                                                           |
| Unit cell lengths (Å)                 | a = 15.0051(7)<br>b = 24.3858(10)<br>c = 14.8468(8)                                           | a = 14.939(5)<br>b = 24.343(5)<br>c = 14.845(5)                                                | a = 14.824(3)<br>b = 24.353(5)<br>c = 14.610(3)                                                | a = 14.952(5)<br>b = 24.363(5)<br>c = 14.825(5)                                                |
| Unit cell angles (°)                  | α = 90<br>β = 90<br>γ = 90                                                                    | α = 90.000(5)<br>β = 90.000(5)<br>γ = 90.000(5)                                                | α = 90.000(5)<br>β = 90.000(5)<br>γ = 90.000(5)                                                | α = 90.000(5)<br>β = 90.000(5)<br>γ = 90.000(5)                                                |
| Volume (Å <sup>3</sup> )              | 5432.6(4)                                                                                     | 5399(3)                                                                                        | 5275(2)                                                                                        | 5400(3)                                                                                        |
| Z                                     | 4                                                                                             | 4                                                                                              | 4                                                                                              | 4                                                                                              |
| Density (calculated)                  | 1.678                                                                                         | 1.856                                                                                          | 1.905                                                                                          | 1.869                                                                                          |
| Absorption coefficient                | 2.879                                                                                         | 3.193                                                                                          | 3.435                                                                                          | 3.504                                                                                          |
| F(000)                                | 2800.0                                                                                        | 3000.0                                                                                         | 3008.0                                                                                         | 3016.0                                                                                         |
| Crystal size (mm)                     | 0.18 × 0.16 × 0.14                                                                            | 0.25 × 0.23 × 0.21                                                                             | 0.24 × 0.22 × 0.20                                                                             | 0.16 × 0.15 × 0.14                                                                             |
| 2θ range for data collection (°)      | 5.43 to 58.062                                                                                | 5.454 to 50.994                                                                                | 3.216 to 50.996                                                                                | 5.114 to 51                                                                                    |
| Reflections collected                 | 59843                                                                                         | 20805                                                                                          | 27129                                                                                          | 20908                                                                                          |
| Index ranges                          | -20 ≤ h ≤ 19, -32 ≤ k ≤ 32, -15 ≤ l ≤ 20                                                      | -14 ≤ h ≤ 18, -29 ≤ k ≤ 23, -17 ≤ l ≤ 16                                                       | -17 ≤ h ≤ 15, -29 ≤ k ≤ 29, -11 ≤ l ≤ 17                                                       | -18 ≤ h ≤ 15, -24 ≤ k ≤ 29, -17 ≤ l ≤ 17                                                       |
| Independent reflections               | 6699 [R <sub>int</sub> = 0.1332]                                                              | 4962 [R <sub>int</sub> = 0.0574]                                                               | 4915 [R <sub>int</sub> = 0.0735]                                                               | 4804 [R <sub>int</sub> = 0.1044]                                                               |
| Data/Restrain/Parameter               | 6699/3/379                                                                                    | 4962/0/380                                                                                     | 4915/2/379                                                                                     | 4804/0/380                                                                                     |
| Goodness-of-fit on F <sup>2</sup>     | 1.023                                                                                         | 1.029                                                                                          | 1.075                                                                                          | 0.985                                                                                          |
| Final R indices [I > 2σ(I)]           | R <sub>1</sub> = 0.0464, wR <sub>2</sub> = 0.0995                                             | R <sub>1</sub> = 0.0379, wR <sub>2</sub> = 0.0727                                              | R <sub>1</sub> = 0.0457, wR <sub>2</sub> = 0.1042                                              | R <sub>1</sub> = 0.0476, wR <sub>2</sub> = 0.0596                                              |
| R indices (all data)                  | R <sub>1</sub> = 0.0820, wR <sub>2</sub> = 0.1108                                             | R <sub>1</sub> = 0.0931, wR <sub>2</sub> = 0.0869                                              | R <sub>1</sub> = 0.0683, wR <sub>2</sub> = 0.1168                                              | R <sub>1</sub> = 0.1542, wR <sub>2</sub> = 0.0791                                              |

# Supporting Information

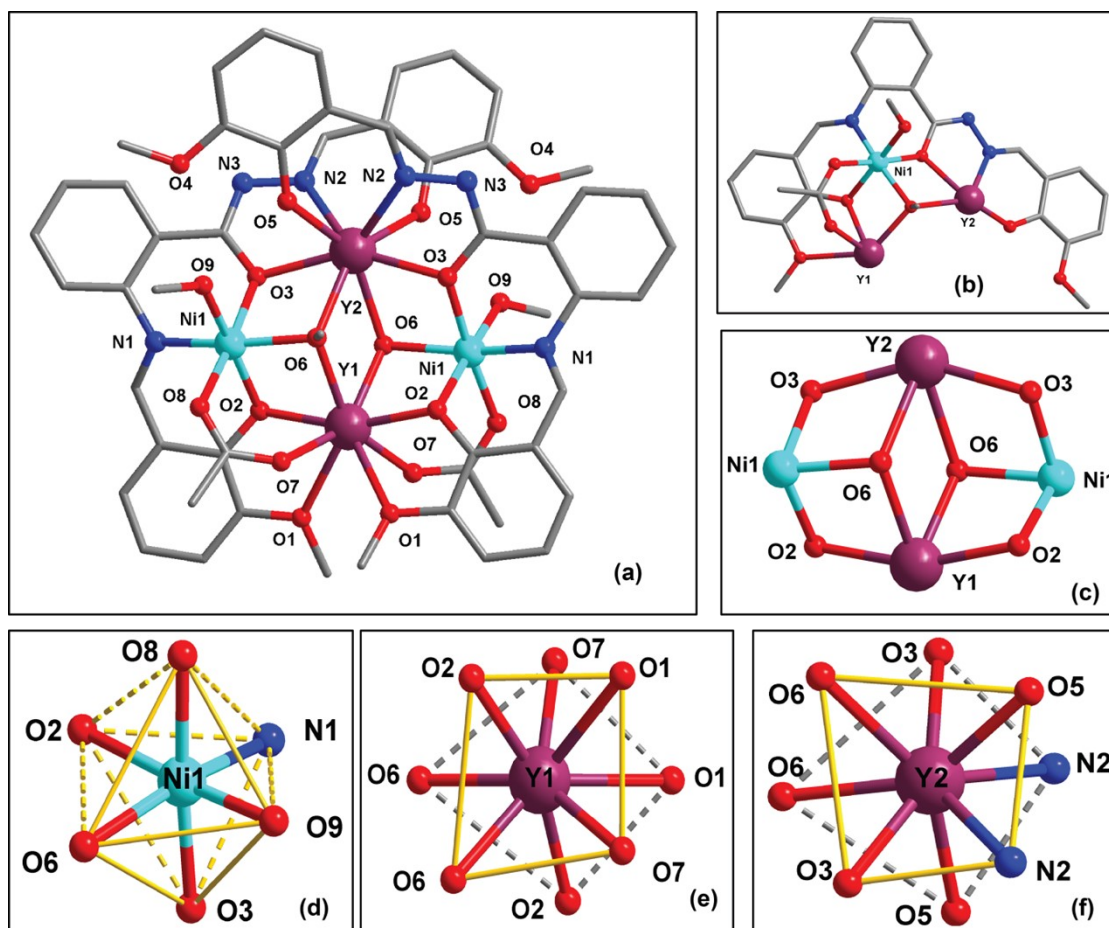

**Figure S1.** Crystal structure of complex 1 (a) asymmetric unit present in the lattice (b) butterfly arrangement of Ni<sub>2</sub>Y<sub>2</sub> core (c).

# Supporting Information

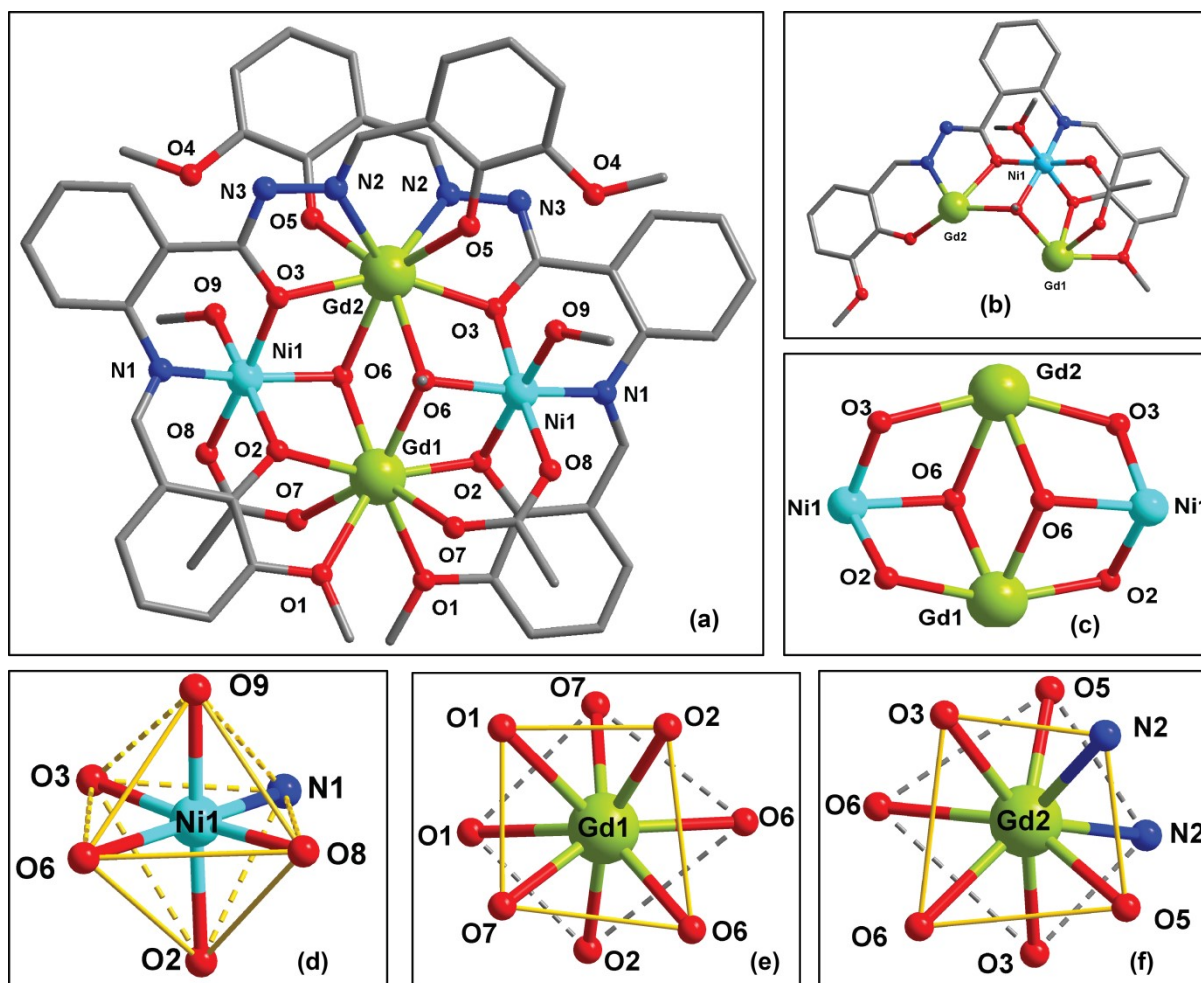

**Figure S2.** Crystal structure of complex 2 (a) asymmetric unit present in the lattice (b) butterfly arrangement of Ni<sub>2</sub>Gd<sub>2</sub> core (c).

# Supporting Information

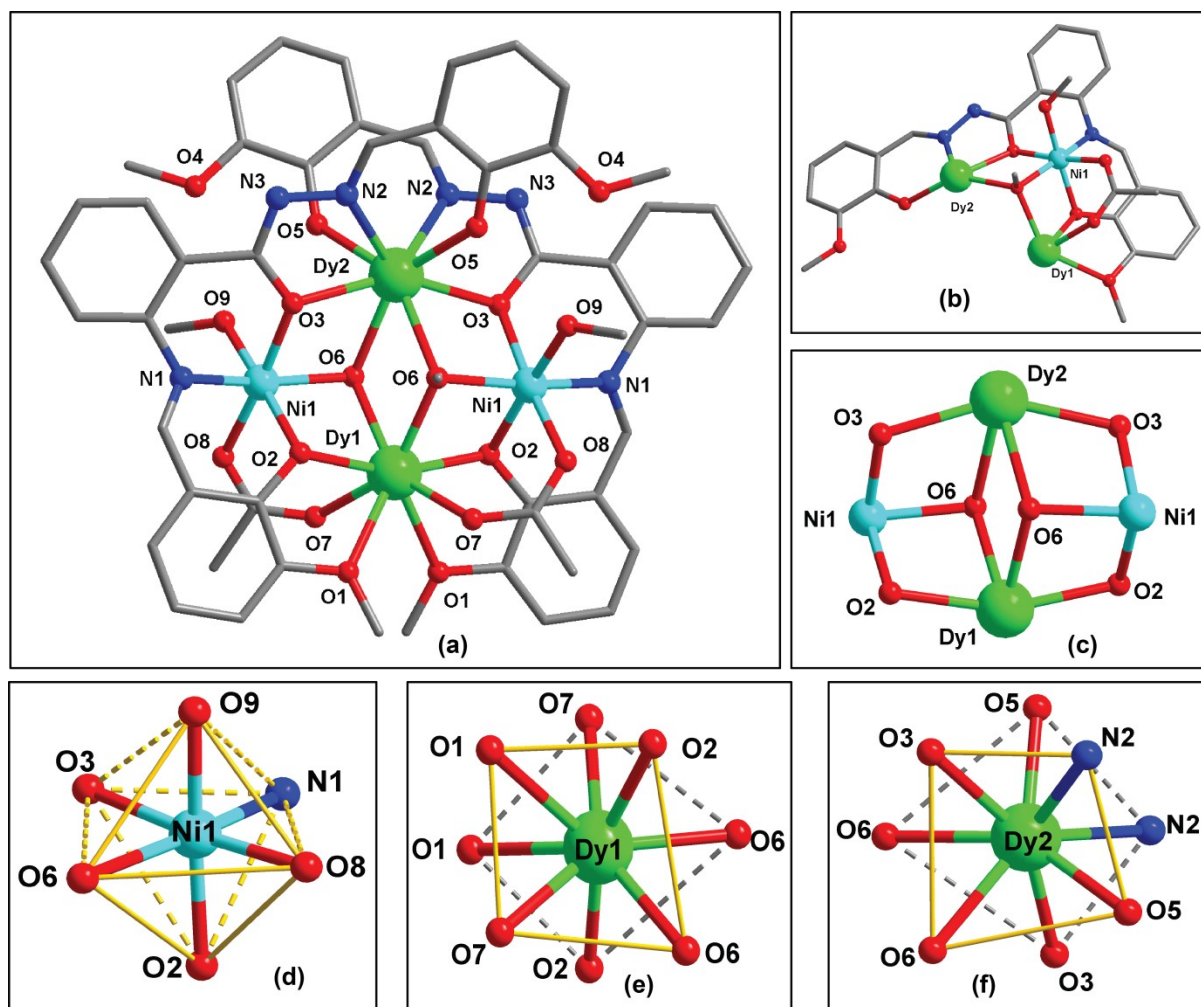

**Figure S3.** Crystal structure of complex 4 (a) asymmetric unit present in the lattice (b) butterfly arrangement of  $\text{Ni}_2\text{Dy}_2$  core (c).

# Supporting Information

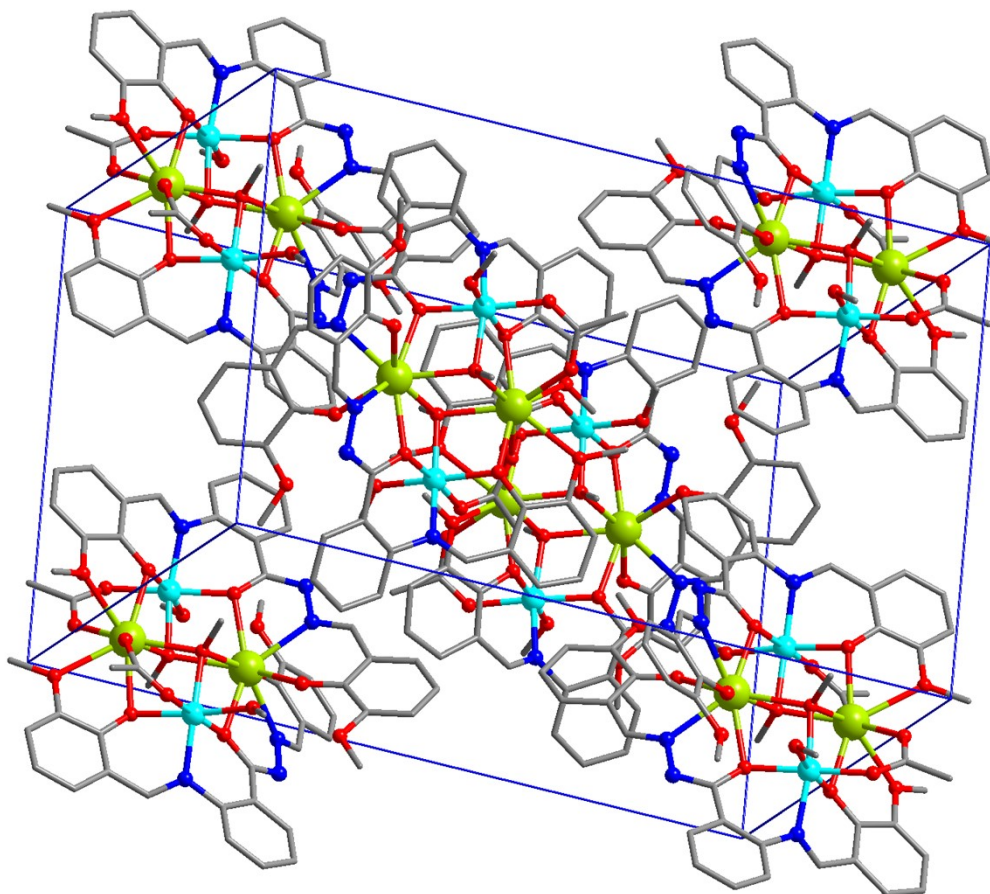

**Figure S4.** Packing structure for representative complex **3** along the c-axis.

**Table S2.** Possible geometries around the Ln(III) metal centres and their corresponding CShM values.

|                  | OP-8   | HPY-8  | HBPY-8 | CU-8   | SAPR-8       | TDD-8 | JGBF-8 | JETBPY-8 | JBTPR-8 | BTPR-8 | JSD-8 | TT-8   | ETBPY-8 |
|------------------|--------|--------|--------|--------|--------------|-------|--------|----------|---------|--------|-------|--------|---------|
| <b>Complex 1</b> |        |        |        |        |              |       |        |          |         |        |       |        |         |
| Y1               | 27.380 | 23.129 | 16.919 | 11.547 | <b>1.217</b> | 2.433 | 12.023 | 24.888   | 2.557   | 2.437  | 3.522 | 12.381 | 19.672  |
| Y2               | 27.423 | 22.754 | 15.116 | 10.923 | <b>2.086</b> | 4.077 | 13.772 | 20.585   | 4.802   | 4.131  | 7.061 | 11.290 | 15.113  |
| <b>Complex 2</b> |        |        |        |        |              |       |        |          |         |        |       |        |         |
| Gd1              | 27.122 | 23.223 | 17.265 | 11.861 | <b>1.200</b> | 2.439 | 12.473 | 24.060   | 2.726   | 2.520  | 3.823 | 12.085 | 18.759  |
| Gd2              | 27.742 | 22.624 | 14.985 | 10.936 | <b>2.349</b> | 4.233 | 13.664 | 20.061   | 5.099   | 4.360  | 7.373 | 11.296 | 14.550  |
| <b>Complex 3</b> |        |        |        |        |              |       |        |          |         |        |       |        |         |
| Tb1              | 26.957 | 23.387 | 17.429 | 12.022 | <b>1.193</b> | 1.193 | 12.295 | 24.172   | 2.671   | 2.459  | 3.725 | 12.274 | 18.943  |
| Tb2              | 27.082 | 22.602 | 15.211 | 11.073 | <b>2.166</b> | 4.299 | 13.747 | 20.292   | 4.819   | 4.272  | 7.003 | 11.424 | 14.782  |
| <b>Complex 4</b> |        |        |        |        |              |       |        |          |         |        |       |        |         |
| Dy1              | 27.382 | 23.157 | 17.138 | 11.840 | <b>1.281</b> | 2.392 | 11.956 | 24.576   | 2.614   | 2.476  | 3.544 | 12.366 | 19.293  |
| Dy2              | 27.163 | 22.579 | 15.201 | 11.089 | <b>2.209</b> | 4.265 | 13.729 | 20.166   | 4.920   | 4.272  | 7.164 | 11.464 | 14.714  |

**OP-8**,  $D_{8h}$ , Octagon; **HPY-8**,  $C_{7v}$ , Heptagonal pyramid; **HBPY-8**,  $D_{6h}$ , Hexagonal bipyramid; **CU-8**,  $O_h$ , Cube; **SAPR-8**,  $D_{4d}$ , Square antiprism; **TDD-8**,  $D_{2d}$ , Triangular dodecahedron; **JGBF-8**,  $D_{2d}$ , Johnson gyrobifastigium J26; **JETBPY-8**,  $D_{3h}$ , Johnson elongated triangular bipyramid J14; **JBTPR-8**,  $C_{2v}$ , Biaugmented trigonal prism J50; **BTPR-8**,  $C_{2v}$ , Biaugmented trigonal prism; **JSD-8**,  $D_{2d}$ , Snub diphenooid J84; **TT-8**,  $T_d$ , Triakis tetrahedron; **ETBPY-8**,  $D_{3h}$ , Elongated trigonal bipyramid.

# Supporting Information

**Table S3.** Bond lengths and bond angles in complex 1

| Bond lengths (Å)   | Bond lengths (Å)   | Bond angles (°)          |
|--------------------|--------------------|--------------------------|
| Y2-O6, 2.4487(18)  | Y1-O2*, 2.309(2)   | Ni1-Y1-Y2, 56.545(8)     |
| Y2-O61, 2.4487(18) | Y1-O2, 2.309(2)    | Ni1*-Y1-Y2, 56.545(8)    |
| Y2-O31, 2.3894(19) | Y1-O1, 2.577(2)    | Ni1-Y1-Ni1*, 113.090(16) |
| Y2-O3, 2.3895(19)  | Y1-O1*, 2.577(2)   | Ni1*-Y2-Y1, 50.996(7)    |
| Y2-O5*, 2.3303(18) | Y1-O7*, 2.293(2)   | Ni1-Y2-Y1, 50.995(7)     |
| Y2-O5, 2.3303(18)  | Y1-O7, 2.293(2)    | Ni1-Y2-Ni1*, 101.991(14) |
| Y2-N2, 2.469(2)    | Ni1-O6, 2.109(2)   | Y1-Ni1-Y2, 72.460(10)    |
| Y2-N2*, 2.469(2)   | Ni1-O3, 2.0304(18) | Y1-O6-Y2, 113.93(8)      |
| Y1-Ni1*, 3.2758(4) | Ni1-O2, 2.091(2)   | Ni1-O6-Y2, 100.74(7)     |
| Y1-Ni1, 3.2758(4)  | Ni1-O8, 2.047(2)   | Ni1-O6-Y1, 94.53(7)      |
| Y1-O6*, 2.3453(18) | Ni1-O9, 2.029(2)   | Ni1-O3-Y2, 105.16(8)     |
| Y1-O6, 2.3454(18)  | Ni1-N1, 2.045(3)   | Ni1-O2-Y1, 96.09(8)      |
|                    | Y2-Y1, 4.0194(5)   |                          |
|                    | Y2-Ni1, 3.5170(4)  |                          |
|                    | Y2-Ni11, 3.5170(4) |                          |

**Table S4.** Bond lengths and bond angles in complex 2

| Bond lengths (Å)     | Bond lengths (Å)  | Bond angles (°)          |
|----------------------|-------------------|--------------------------|
| Gd1-Gd2, 4.0613(10)  | Gd1-O7*, 2.337(4) | Ni1-Gd1-Gd2, 56.275(16)  |
| Gd1-Ni1*, 3.3143(10) | Gd2-O6*, 2.477(3) | Ni1*-Gd1-Gd2, 56.274(16) |
| Gd1-Ni1, 3.3143(10)  | Gd2-O6, 2.477(3)  | Ni1-Gd1-Ni1* , 112.55(3) |
| Gd1-O6, 12.367(3)    | Gd2-O5, 2.354(4)  | Gd1-O6-Gd2 113.92(14)    |
| Gd1-O6, 2.367(3)     | Gd2-O5*, 2.354(4) | Ni1-O6-Gd1, 95.64(13)    |
| Gd1-O1, 2.590(4)     | Gd2-O3, 2.421(3)  | Ni1-O6-Gd2 101.04(13)    |
| Gd1-O1*, 2.591(4)    | Gd2-O3*, 2.421(3) | Ni1-O3-Gd2, 104.85(14)   |
| Gd1-O2, 2.350(4)     | Gd2-N2*, 2.496(4) | Ni1-O2-Gd1, 96.65(14)    |
| Gd1-O2*, 2.350(4)    | Gd2-N2, 2.496(4)  |                          |
| Gd1-O7, 2.337(4)     | Ni1-O6, 2.099(4)  |                          |

# Supporting Information

|                  |  |
|------------------|--|
| Ni1-O3, 2.036(3) |  |
| Ni1-O2, 2.080(4) |  |
| Ni1-O9, 2.038(4) |  |
| Ni1-O8, 2.052(4) |  |
| Ni1-N1, 2.044(5) |  |

**Table S5.** Bond lengths and bond angles in complex **3**

| Bond lengths (Å)  |  | Bond lengths (Å)    |  | Bond angles (°)         |
|-------------------|--|---------------------|--|-------------------------|
| Tb1-O6*, 2.355(4) |  | Tb2-O5, 2.347(4)    |  | Ni1*-Tb1-Ni1, 112.60(3) |
| Tb1-O6, 2.355(4)  |  | Tb2-O3*, 2.402(4)   |  | Tb1-O6-Tb2, 113.97(18)  |
| Tb1-O7, 2.321(4)  |  | Tb2-O3, 2.402(4)    |  | Ni1-O6-Tb1, 95.82(16)   |
| Tb1-O7*, 2.321(4) |  | Tb2-N2*, 2.481(5)   |  | Ni1-O6-Tb2, 100.97(16)  |
| Tb1-O1*, 2.569(4) |  | Tb2-N2, 2.481(5)    |  | Ni1-O2-Tb1, 96.85(16)   |
| Tb1-O1, 2.570(4)  |  | Ni1-O6, 2.097(4)    |  | Ni1-O3-Tb2, 105.09(17)  |
| Tb1-O2*, 2.338(4) |  | Ni1-O8*, 2.060(4)   |  |                         |
| Tb1-O2, 2.338(4)  |  | Ni1-O2, 2.078(4)    |  |                         |
| Tb2-O6, 2.468(4)  |  | Ni1-O3, 2.036(4)    |  |                         |
| Tb2-O6*, 2.468(4) |  | Ni1-O9, 2.029(4)    |  |                         |
| Tb2-O5*, 2.347(4) |  | Ni1-N1, 2.043(5)    |  |                         |
|                   |  | Tb1-Ni1, 3.3084(9)  |  |                         |
|                   |  | Tb1-Ni1*, 3.3083(9) |  |                         |

**Table S6.** Bond lengths and bond angles in complex **4**

| Bond lengths (Å)  |  | Bond lengths (Å)  |  | Bond angles (°)        |
|-------------------|--|-------------------|--|------------------------|
| Dy2-O6*, 2.455(4) |  | Dy1-O6*, 2.342(4) |  | Dy1-O6-Dy2, 114.40(17) |
| Dy2-O6, 2.455(4)  |  | Dy1-O6, 2.342(4)  |  | Ni1-O6-Dy2, 101.27(17) |
| Dy2-N2*, 2.467(6) |  | Dy1-O1, 2.585(5)  |  | Ni1-O6-Dy1, 95.47(16)  |
| Dy2-N2, 2.467(6)  |  | Dy1-O1*, 2.585(5) |  |                        |



# Supporting Information

|                      |                   |                         |
|----------------------|-------------------|-------------------------|
| Dy2-O5, 2.332(5)     | Dy1-O7*, 2.297(6) | Ni1-Dy1-Ni1*, 112.93(4) |
| Dy2-O5*, 2.332(5)    | Dy1-O7, 2.297(6)  | Ni1-O3-Dy2, 105.25(19)  |
| Dy2-O3*, 2.399(4)    | Ni1-O6, 2.094(4)  | Ni11-O2-Dy1, 96.28(18)  |
| Dy2-O3, 2.399(4)     | Ni1-O3, 2.027(4)  |                         |
| Dy1-Ni1*, 3.2871(12) | Ni1-O8, 2.048(5)  |                         |
| Dy1-Ni1, 3.2871(11)  | Ni1-O9, 2.039(7)  |                         |
| Dy1-O2, 2.317(4)     | Ni1-O2*, 2.092(5) |                         |
| Dy1-O2*, 2.317(4)    | Ni1-N1, 2.042(6)  |                         |

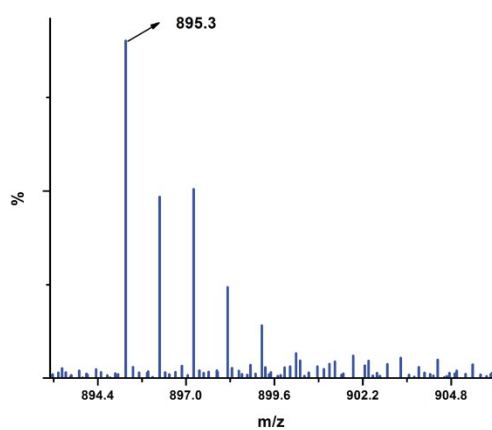

(a)

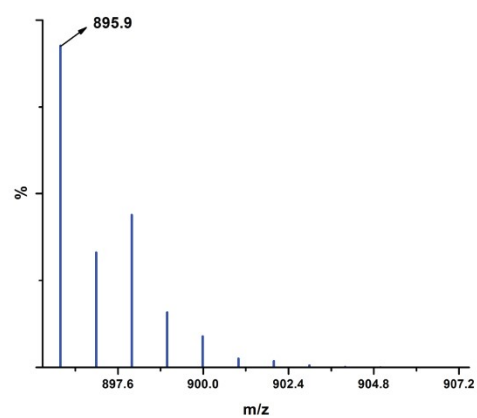

(b)

# Supporting Information

ESI-MS for complex **1**, detecting  $[\{L'\{Ni(MeOH)(\mu-OAc)_2(\mu_3-MeO)_2Y_2\} \cdot (MeOH)\}]^+$  fragment, (a) experimental and (b) theoretical.

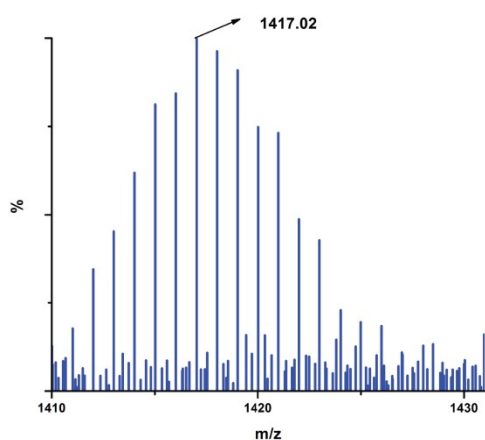

(c)

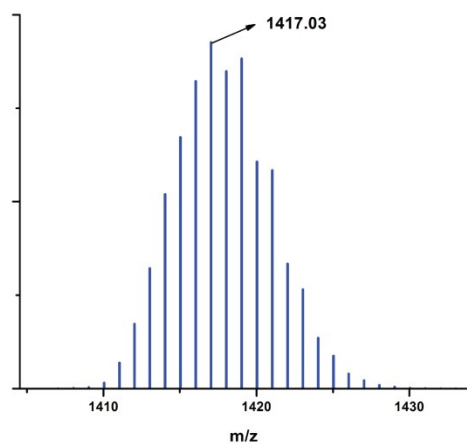

(d)

ESI-MS for complex **2**, detecting  $[\{L'_2\{Ni(MeOH)(\mu-OAc)\}(\mu_3-MeO)_2Gd_2\}]^+$  fragment, (c) experimental and (d) theoretical.

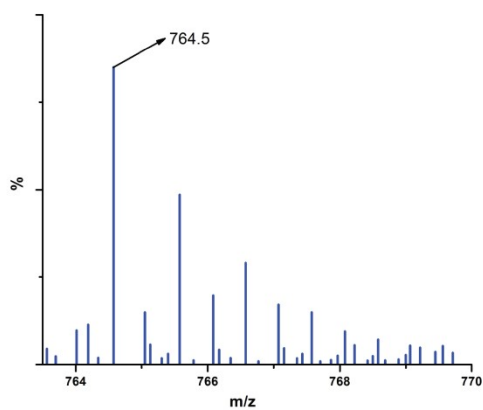

(e)

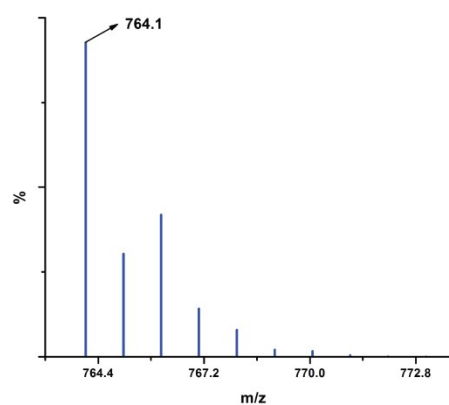

(f)

ESI-MS for complex **3**, detecting  $[\{L'\{Ni(MeOH)Tb\} \cdot (H_2O) \cdot (MeCN)_2\}]^+$  fragment, (e) experimental and (f) theoretical.

# Supporting Information

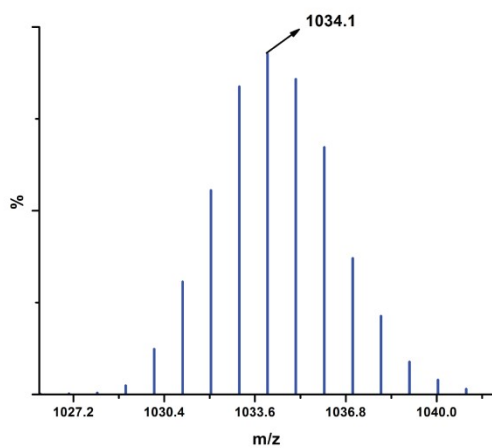

(g)

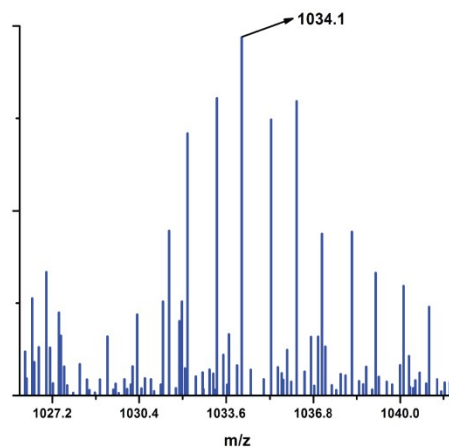

(h)

ESI-MS for complex **4**, detecting [ $\{L'\{Ni(MeOH)(\mu-OAc)\}(\mu_3-MeO)_4Dy_2(H_2O)\}$ ] fragment, (g) theoretical and (h) experimental.

**Figure S5.** Mass Spectra of complexes **1-4** [ (a) and (b) for **1**; (c) and (d) for **2**; (e) and (f) for **3**; (g) and (h) for **4**] collected in methanol-acetonitrile solvent.

## Supporting Information

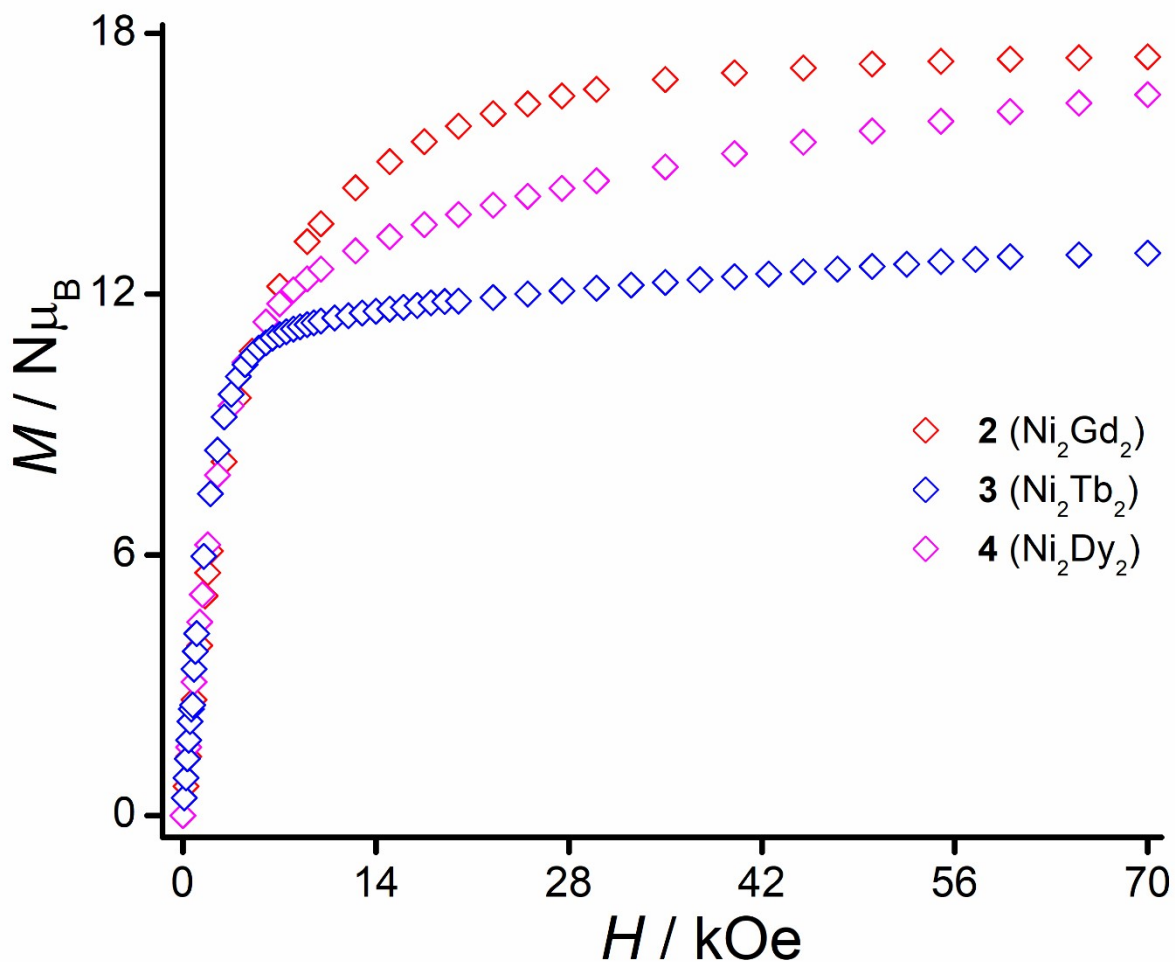

**Figure S6.** Field dependent magnetization at 1.8 K for complexes 2-4.

**Table S7:** Best fitted parameters ( $\chi_\infty$ ,  $\chi_0$ ,  $\tau$  and  $\alpha$ ) with the generalized Debye model in the temperature range 1.80-2.83 K for complex 3 ( $H_{dc} = 0$  Oe).

| T (K) | $\chi_\infty$ (cm <sup>3</sup> mol <sup>-1</sup> ) | $\chi_0$ (cm <sup>3</sup> mol <sup>-1</sup> ) | $\tau$ ( $\times 10^{-4}$ s) | $\alpha$ |
|-------|----------------------------------------------------|-----------------------------------------------|------------------------------|----------|
| 1.80  | 22.23707                                           | 1.63377                                       | 7.148                        | 0.21244  |
| 1.89  | 21.22806                                           | 1.82524                                       | 5.060                        | 0.20481  |
| 1.98  | 20.17194                                           | 2.12911                                       | 3.514                        | 0.19399  |
| 2.08  | 19.29892                                           | 2.49672                                       | 2.625                        | 0.18089  |
| 2.20  | 18.35976                                           | 2.95115                                       | 1.912                        | 0.16565  |
| 2.33  | 17.39817                                           | 3.42789                                       | 1.371                        | 0.15010  |
| 2.48  | 16.39003                                           | 3.86542                                       | 0.9589                       | 0.13343  |
| 2.64  | 15.34065                                           | 4.05234                                       | 0.6346                       | 0.11797  |
| 2.83  | 14.26437                                           | 3.39710                                       | 0.3688                       | 0.10925  |

# Supporting Information

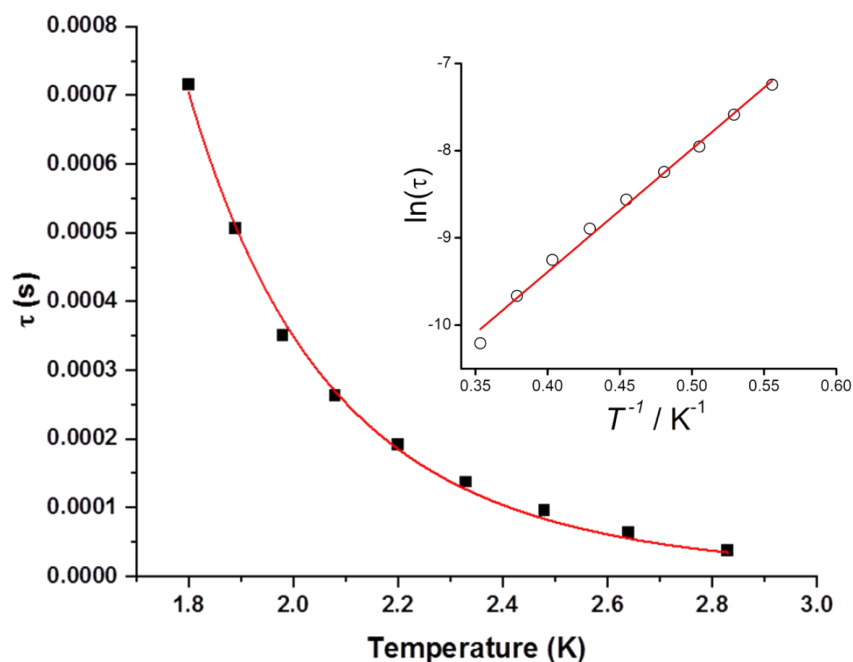

**Figure S7.** Relaxation times (from zero field measurement) as a function of temperature for complex **3**. Full squares: experimental points, red line: best fit with Raman process.  $\ln(\tau)$  vs  $1/T$  plot fitted by Arrhenius law (inset).

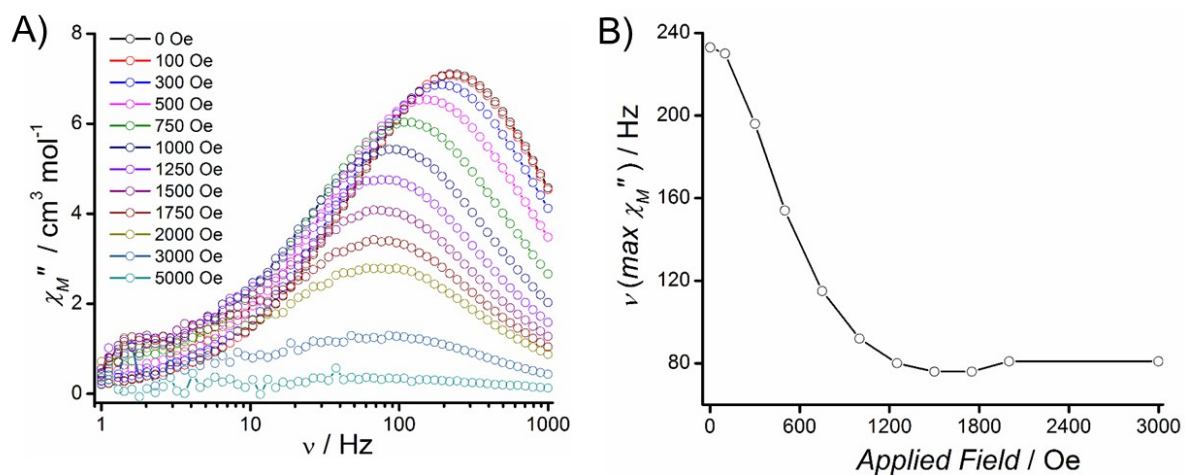

**Figure S8.** Field dependent ac magnetic susceptibility measurement for complex **3**. A) out-of-phase susceptibility curves for complex  $\text{Ni}_2\text{Tb}_2$  at 1.8 K with an ac field of 2 Oe and under various applied dc fields. B) frequency of the maximum of  $\chi_M''$  as a function of the applied dc field.

# Supporting Information

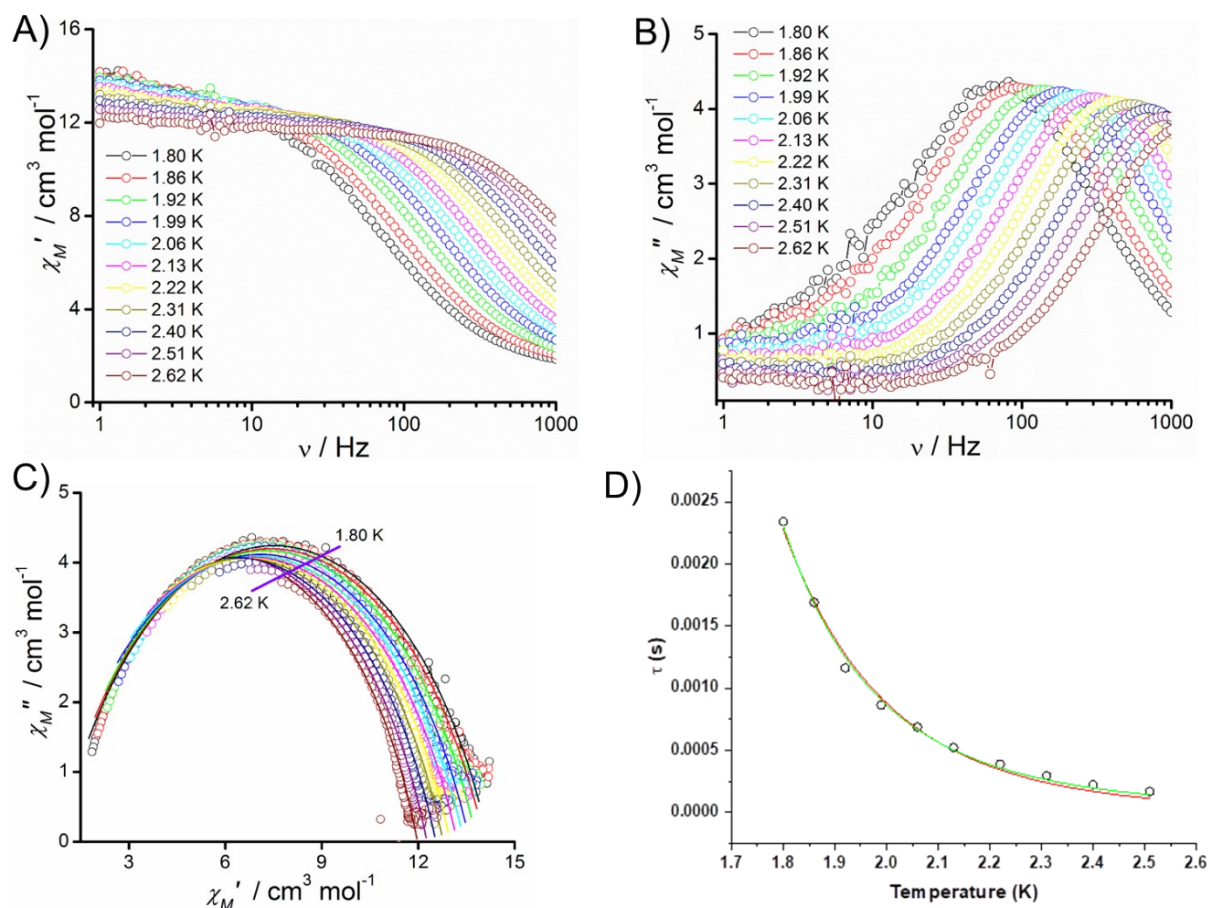

**Figure. S9.** Ac susceptibility measurement under  $H_{dc} = 1.5$  kOe and  $H_{ac} = 2$  Oe for complex **3**. In-phase (A), out-of-phase (B) susceptibilities and Cole–Cole (C) plots respectively. (D) Best fits of the relaxation times (open circles: experimental points, full red line : best fit using Raman mechanism, full green line : best fit using Orbach mechanism).

**Table S8.** Best fitted parameters with the generalized Debye model for complex **3** under  $H_{dc} = 0.15$  kOe in the temperature range 1.8-2.62 K.

| T (K) | $\chi_{\infty}$ (cm <sup>3</sup> mol <sup>-1</sup> ) | $\chi_0$ (cm <sup>3</sup> mol <sup>-1</sup> ) | $\tau$ ( $\times 10^{-4}$ s) | $\alpha$ |
|-------|------------------------------------------------------|-----------------------------------------------|------------------------------|----------|
| 1.80  | 14.19198                                             | 0.8319                                        | 24.6                         | 0.2797   |
| 1.86  | 14.06964                                             | 0.7467                                        | 18.1                         | 0.28405  |
| 1.92  | 13.82743                                             | 0.73357                                       | 12.5                         | 0.27792  |
| 1.99  | 13.6014                                              | 0.60761                                       | 8.86                         | 0.28085  |
| 2.06  | 13.42961                                             | 0.5166                                        | 6.61                         | 0.28099  |
| 2.13  | 13.21077                                             | 0.47336                                       | 4.86                         | 0.27511  |
| 2.22  | 12.99189                                             | 0.44575                                       | 3.55                         | 0.26792  |
| 2.31  | 12.77427                                             | 0.33485                                       | 2.56                         | 0.26369  |
| 2.40  | 12.54407                                             | 0.09791                                       | 1.79                         | 0.26244  |
| 2.51  | 12.27017                                             | 0                                             | 1.24                         | 0.25504  |
| 2.62  | 11.97271                                             | 0                                             | 0.89                         | 0.23887  |

# Supporting Information

**Table S9.** BS-DFT computed energies of high-spin and broken-symmetry solution of complex **2** using  $H=-JS_1S_2$  formalism. Here we have chosen five solutions to extract the J value.

| Solution | Energy ( $E_h$ ) | $\rho^{Gd1}$ | $\rho^{Gd2}$ | $\rho^{Ni1}$ | $\rho^{Ni2}$ | $\langle S^{*2} \rangle$ | $J$ ( $cm^{-1}$ ) |
|----------|------------------|--------------|--------------|--------------|--------------|--------------------------|-------------------|
| HS       | -7015.793087     | 7.015        | 7.027        | 1.710        | 1.710        | 90.029                   | $J_1 = 1.027$     |
| BS1      | -7015.793047     | -7.024       | 7.028        | 1.710        | 1.710        | 13.029                   | $J_2 = 0.513$     |
| BS2      | -7015.793009     | 7.017        | -7.029       | 1.708        | 1.708        | 13.029                   | $J_3 = 0.024$     |
| BS3      | -7015.792975     | 7.023        | 7.029        | -1.709       | -1.709       | 34.029                   | $J_4 = 0.324$     |
| BS4      | -7015.793027     | 7.019        | 7.028        | 1.709        | -1.709       | 58.029                   |                   |
| BS5      | -7015.793026     | 7.020        | -7.029       | -1.710       | 1.708        | 9.029                    |                   |
| BS6      | -7015.793026     | 7.020        | -7.029       | 1.708        | -1.710       | 9.029                    |                   |
| BS7      | -7015.793026     | -7.020       | 7.029        | 1.710        | -1.708       | 9.029                    |                   |

• see Figure S10 for J values.

**Table S10.** BS-DFT computed energies of high-spin and broken-symmetry solution of complex **1** using  $H=-JS_1S_2$  formalism. Here we have chosen five solutions to extract the J value.

| Solution | Energy ( $E_h$ ) | $\rho^{Gd1}$ | $\rho^{Gd2}$ | $\langle S^{*2} \rangle$ | $J$    |
|----------|------------------|--------------|--------------|--------------------------|--------|
| HS       | -6863.888878     | 1.6794       | 1.6794       | 6.0086                   | -0.273 |
| BS1      | -6863.888876     | 1.6771       | -1.6771      | 2.0086                   |        |

*J* values are estimated using the following equation,

$$J = \frac{E_{BS} - E_{HS}}{s_1 s_2 + s_2 / 2}$$

## Supporting Information

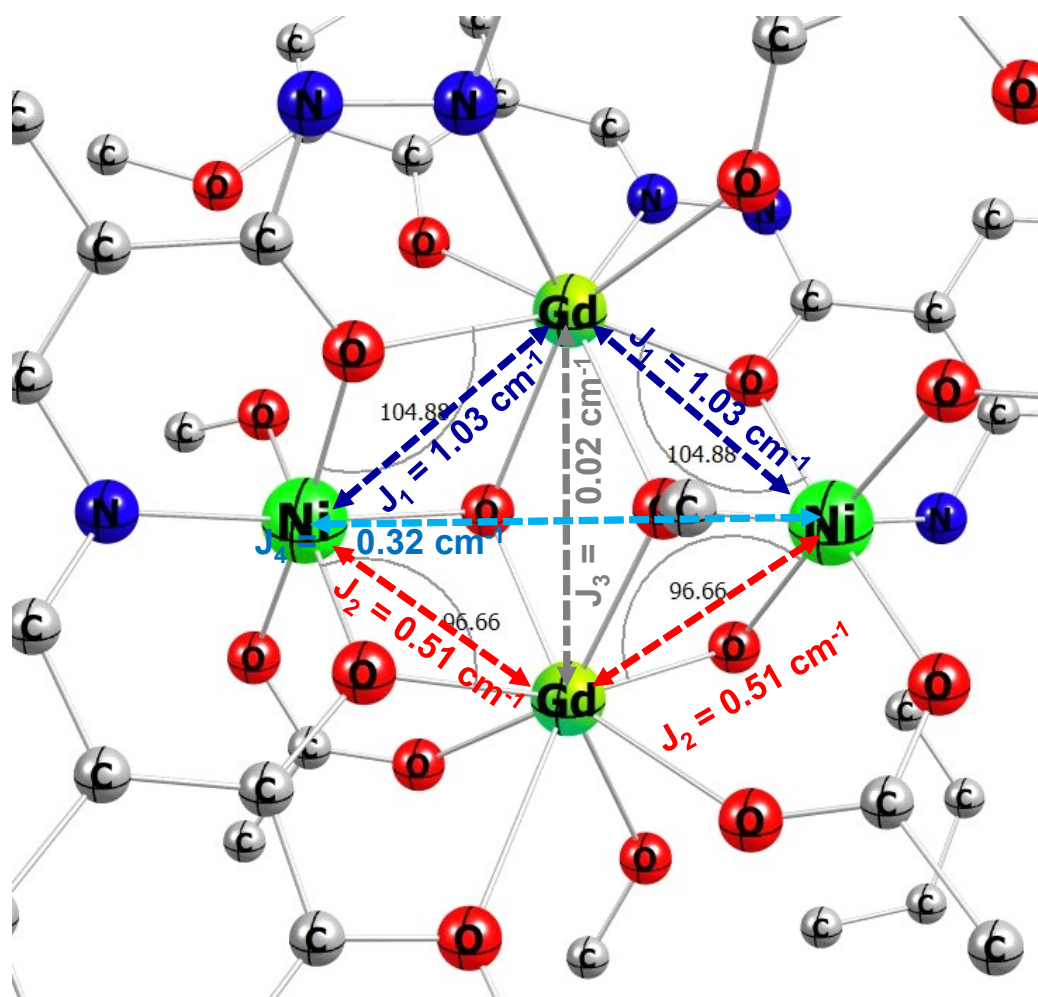

**Figure S10.** Core structure of complex 2 with relevant  $\angle\text{Ni-O-Gd}$  bond angle and the corresponding J values.



# Supporting Information

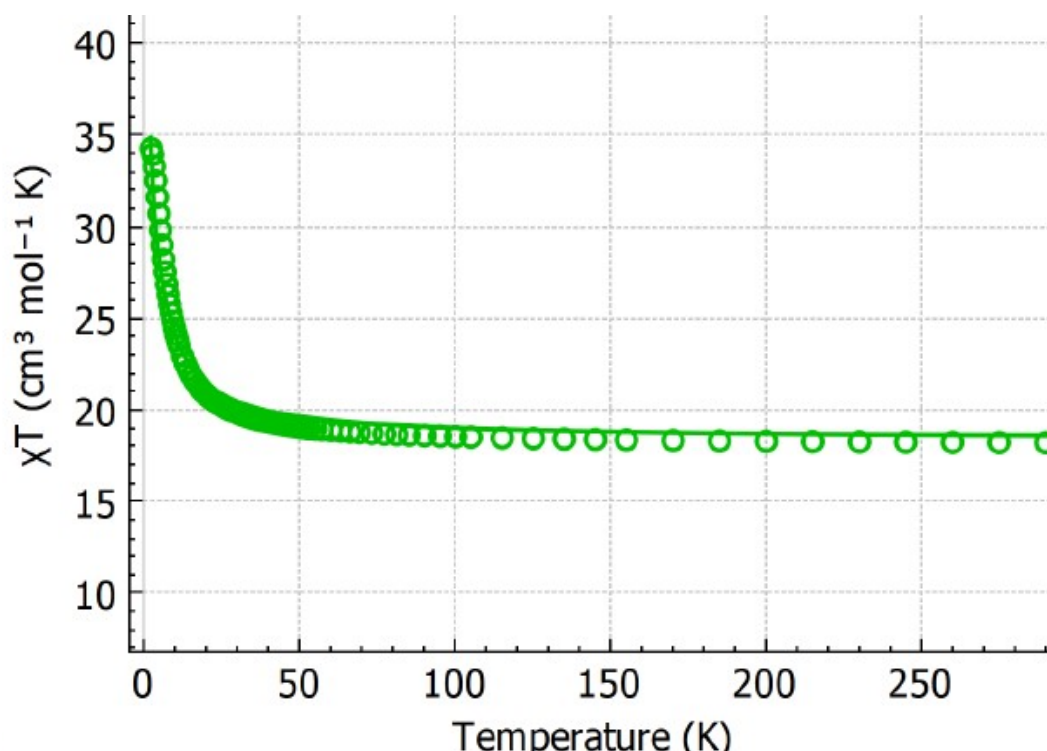

**Figure S11.** Thermal variation of  $\chi_{MT}$  for complex **2**. The green hollow circle represents the experimental magnetic susceptibility data, while the green curve represents simulation with DFT calculated  $J$  values. The  $g$ -values for Ni(II) centers are 2.28; 2.29; 2.33, while isotropic  $g$ -values of 2.0 chosen for Gd(III) center.

**Table S11.** Calculate overlap integral values for both {NiGd} centers with different bond angles. The values kept in bold format are the strongest overlaps.

| <i>Gd1</i>                   | $\angle$ Ni-O-Gd (96.6°)    |                         | <i>Gd2</i>                   | $\angle$ Ni-O-Gd (104.8°)   |                         |
|------------------------------|-----------------------------|-------------------------|------------------------------|-----------------------------|-------------------------|
| <i>f-orbital</i><br>(number) | Ni( $d_{x^2-y^2}$ ) orbital | Ni( $d_{z^2}$ -orbital) | <i>f-orbital</i><br>(number) | Ni( $d_{x^2-y^2}$ ) orbital | Ni( $d_{z^2}$ -orbital) |
| 167                          | -0.0060                     | -0.0043                 | 174                          | <b>-0.0147</b>              | 0.0025                  |
| 168                          | 0.0042                      | <b>-0.0182</b>          | 175                          | <b>-0.0289</b>              | 0.0010                  |
| 169                          | 0.0032                      | -0.0047                 | 176                          | -0.0072                     | <b>0.0161</b>           |
| 170                          | <b>-0.0118</b>              | 0.0090                  | 177                          | -0.0068                     | -0.0035                 |
| 171                          | 0.0054                      | -0.0046                 | 178                          | 0.0047                      | -0.0091                 |

# Supporting Information

|     |               |               |     |         |         |
|-----|---------------|---------------|-----|---------|---------|
| 172 | <b>0.0106</b> | 0.0086        | 179 | -0.0066 | -0.0056 |
| 173 | <b>0.0114</b> | <b>0.0128</b> | 180 | -0.0071 | -0.0002 |

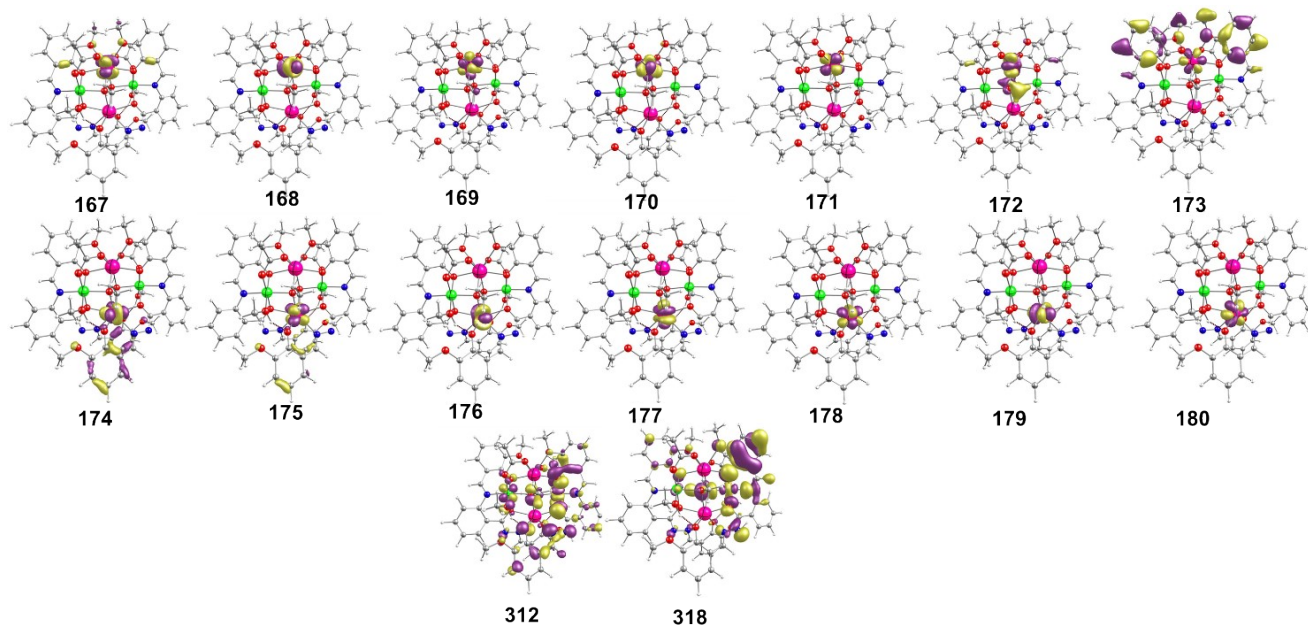

**Figure S12.** The corresponding orbitals for which the overlap integral values were calculated between {NiGd} centers in complex **2**.

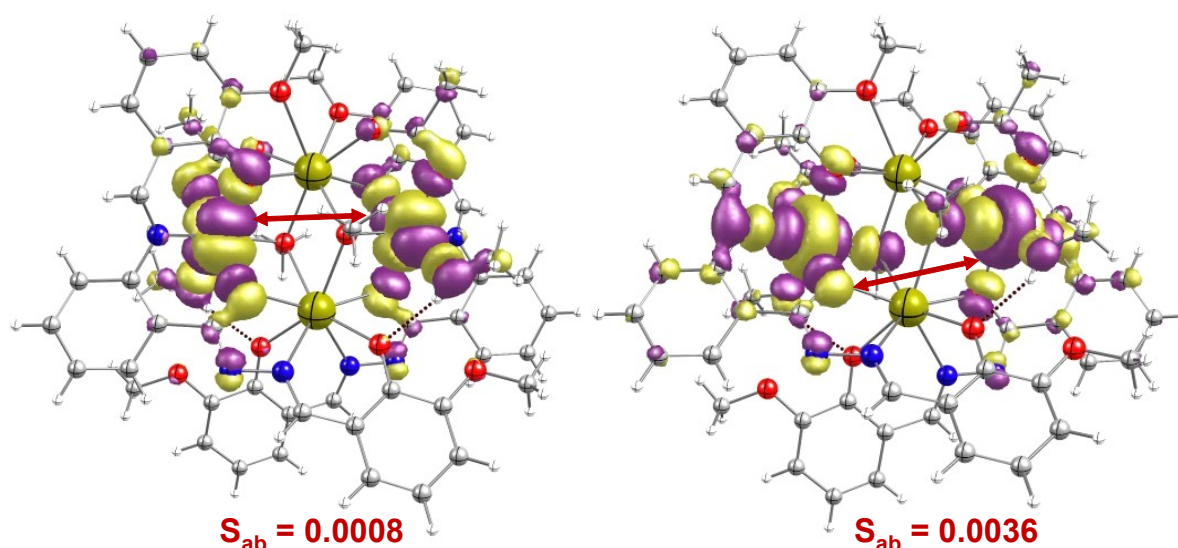

**Figure S13.** The corresponding orbitals and the computed overlap integral value between the Ni—Ni centers in complex **1**.

# Supporting Information

**Table S12.** Basis functions used in *ab initio* CASSCF calculations using MOLCAS 8.2 code.

| Atoms  | ANO-RCC basis functions |
|--------|-------------------------|
| H      | 2s                      |
| C      | 3s2p                    |
| N, O   | 3s2p1d                  |
| Zn     | 5s4p2d1f                |
| Ni     | 6s5p3d2f1g              |
| Y      | 7s6p4d2f1g              |
| Dy, Tb | 8s7p5d3f2g1h            |

# Supporting Information

**Table S13.** CASSCF computed low-lying 7 septets (grey) and 140 quintets (red) spin-free states for Tb1 and Tb2 centres in complex **3**. All the values are reported here in cm<sup>-1</sup>.

| Spin-free states |         |         |         |         |         |
|------------------|---------|---------|---------|---------|---------|
| Tb1              |         |         | Tb2     |         |         |
| 0.0              | 40479.4 | 57927.1 | 0.000   | 40382.1 | 57838.2 |
| 117.0            | 40505.2 | 58001.0 | 25.9    | 40387.0 | 57894.8 |
| 374.0            | 40516.5 | 58008.2 | 166.6   | 40427.0 | 57895.3 |
| 395.1            | 40536.0 | 58110.0 | 418.1   | 40442.9 | 57972.6 |
| 769.4            | 40562.8 | 58140.1 | 444.5   | 40470.4 | 57980.8 |
| 835.1            | 40632.7 | 58156.8 | 685.8   | 40484.5 | 58009.1 |
| 940.7            | 40636.2 | 68685.4 | 709.8   | 40485.1 | 68555.0 |
| 25813.7          | 40678.9 | 75211.3 | 25707.0 | 40542.8 | 75112.7 |
| 25824.6          | 40687.2 | 75217.3 | 25713.3 | 40574.4 | 75120.2 |
| 25924.3          | 40739.6 | 75222.6 | 25778.0 | 40580.3 | 75121.6 |
| 26001.6          | 40776.2 | 75269.5 | 25861.0 | 40635.2 | 75152.1 |
| 26024.6          | 40820.8 | 75294.6 | 25870.1 | 40644.0 | 75179.0 |
| 29308.2          | 40826.4 | 75342.1 | 29247.5 | 40691.2 | 75214.6 |
| 29312.1          | 40873.4 | 75357.8 | 29249.5 | 40734.0 | 75239.8 |
| 29334.5          | 40925.4 | 75391.2 | 29257.4 | 40765.2 | 75260.9 |
| 29363.0          | 40937.7 | 75404.9 | 29263.5 | 40767.6 | 75283.2 |
| 29363.0          | 45897.1 | 75433.7 | 29294.7 | 45769.8 | 75286.6 |
| 29411.8          | 45905.2 | 75466.8 | 29295.6 | 45774.7 | 75367.1 |
| 29497.1          | 45955.1 | 75595.2 | 29421.8 | 45833.3 | 75401.0 |
| 29543.4          | 45959.6 | 75612.3 | 29421.9 | 45834.6 | 75435.1 |
| 29550.3          | 45965.8 | 77674.0 | 29442.0 | 45843.9 | 77576.9 |
| 29622.4          | 46009.6 | 77683.5 | 29458.1 | 45875.1 | 77584.2 |
| 29626.0          | 46023.5 | 77756.8 | 29487.0 | 45905.2 | 77628.3 |
| 29695.3          | 46044.0 | 77762.3 | 29492.1 | 45909.5 | 77637.8 |
| 29696.1          | 46067.0 | 77775.5 | 29502.4 | 45910.0 | 77720.9 |
| 29731.3          | 46091.0 | 77988.6 | 29538.7 | 45974.4 | 77807.8 |
| 29735.0          | 46130.8 | 78105.0 | 29544.8 | 45997.5 | 77914.2 |
| 29865.7          | 46140.3 | 93198.8 | 29695.6 | 46013.5 | 93142.6 |
| 29866.8          | 46180.6 | 93214.4 | 29696.6 | 46024.8 | 93169.4 |
| 30714.8          | 46256.9 | 93398.3 | 30606.2 | 46097.5 | 93400.0 |
| 30743.4          | 46265.5 | 93533.4 | 30661.5 | 46097.7 | 93434.9 |
| 30870.5          | 50249.8 | 93588.5 | 30709.1 | 50159.2 | 93569.7 |
| 30926.7          | 50269.1 | 93810.4 | 30787.8 | 50182.0 | 93647.5 |
| 30947.5          | 50274.9 | 93851.1 | 30824.8 | 50191.0 | 93687.5 |
| 30958.8          | 50353.5 | 94123.3 | 30835.5 | 50200.6 | 93866.8 |
| 30971.2          | 50358.8 | 94141.8 | 30848.7 | 50226.4 | 93885.8 |
| 31025.6          | 50380.9 | 95281.6 | 30855.8 | 50235.2 | 95227.4 |
| 31029.0          | 50403.7 | 95357.0 | 30863.5 | 50267.9 | 95229.4 |
| 35369.3          | 50513.5 | 95577.5 | 35264.4 | 50370.0 | 95489.7 |
| 35375.3          | 50528.4 | 95839.4 | 35301.3 | 50385.6 | 95636.4 |
| 35460.9          | 51828.9 | 95844.1 | 35363.0 | 51734.5 | 95643.6 |
| 35463.4          | 51898.8 |         | 35382.4 | 51840.5 |         |
| 35498.1          | 52114.1 |         | 35385.1 | 51973.7 |         |
| 35580.8          | 52264.2 |         | 35478.0 | 52075.2 |         |
| 35694.6          | 52339.6 |         | 35538.2 | 52136.3 |         |
| 35695.8          | 54667.5 |         | 35549.3 | 54566.1 |         |
| 35776.3          | 54815.0 |         | 35579.1 | 54723.5 |         |
| 35830.6          | 55040.0 |         | 35648.6 | 54860.4 |         |
| 35861.4          | 57812.9 |         | 35668.2 | 57670.0 |         |
| 40370.2          | 57859.9 |         | 40252.1 | 57717.9 |         |
| 40382.9          | 57864.8 |         | 40307.2 | 57721.8 |         |
| 40431.1          | 57899.7 |         | 40307.8 | 57738.0 |         |
| 40468.4          | 57909.2 |         | 40321.2 | 57800.2 |         |

# Supporting Information

**Table S14.** CASSCF+RASSI-SO computed low-lying spin-orbit states, corresponding  $g$ -values and tunnel splitting values for Tb1 and Tb2 centres in complex **3**. All the energy values are reported here in  $\text{cm}^{-1}$ .

| <b>Tb1</b>       |          |                                      |
|------------------|----------|--------------------------------------|
| $\pm m_J$ states | $g_{zz}$ | $\Delta_{\text{tun}}/\text{cm}^{-1}$ |
| 0.000/0.049      | 17.6681  | 0.049                                |
| 173.4/ 174.4     | 13.7219  | 0.990                                |
| 302.5/ 310.8     | 9.6761   | 8.294                                |
| 448.8/ 473.3     | 8.5774   | 24.467                               |
| 492.9/504.1      | 11.5530  | 11.170                               |
| 640.0/642.0      | 17.0905  | 2.0                                  |
| <b>Tb2</b>       |          |                                      |
| 0.0/ 0.3         | 17.6415  | 0.368                                |
| 113.9/130.0      | 12.4421  | 16.125                               |
| 222.0/225.2      | 9.2048   | 3.224                                |
| 340.5/344.7      | 13.2076  | 4.204                                |
| 426.7/428.1      | 16.1552  | 1.400                                |
| 461.1/463.03     | 14.4483  | 1.852                                |

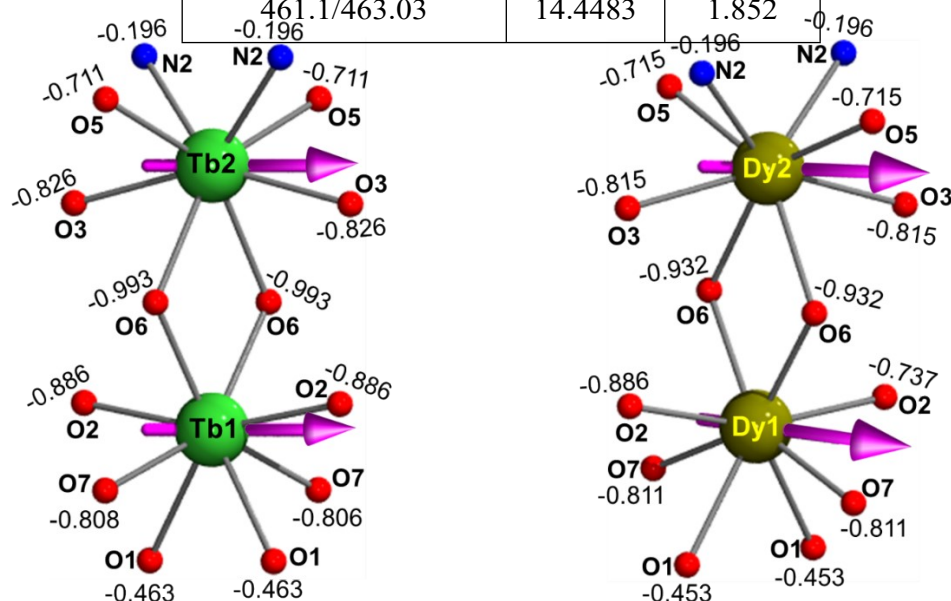

**Figure S14.** CASSCF computed LoProp charges on the first coordinating atoms of Tb and Dy centers in complex **3** and **4** respectively along with the ground state  $g_{zz}$  orientation.

**Table S15.** SINGLE\_ANISO computed wave function decomposition analysis for Tb1 and Tb2 centres in complex **3**. The major dominating values are kept in bold.

# Supporting Information

| $\pm m_J$  | <i>wave function decomposition analysis</i>                                                                             |
|------------|-------------------------------------------------------------------------------------------------------------------------|
| <b>Tb1</b> |                                                                                                                         |
| 1          | <b>96.6%</b> $ \pm 6\rangle + 2.6%$ $ \pm 4\rangle$                                                                     |
| 2          | <b>86.6%</b> $ \pm 5\rangle + 8.6%$ $ \pm 3\rangle + 3.6%$ $ \pm 2\rangle + 1.1%$ $ \pm 1\rangle$                       |
| 3          | <b>62.0%</b> $ \pm 4\rangle + 19.3%$ $ \pm 1\rangle + 13.5%$ $ \pm 2\rangle + 2.4%$ $ \pm 6\rangle + 2.4%$ $ 0\rangle$  |
| 4          | <b>38.6%</b> $ 0\rangle + 37.6%$ $ \pm 3\rangle + 14.3%$ $ \pm 1\rangle + 7.6%$ $ \pm 5\rangle + 1.4%$ $ \pm 4\rangle$  |
| 5          | <b>49.1%</b> $ \pm 1\rangle + 44.8%$ $ \pm 2\rangle + 3.2%$ $ \pm 3\rangle + 2.6%$ $ \pm 5\rangle$                      |
| 6          | <b>52.9%</b> $ \pm 1\rangle + 23.9%$ $ 0\rangle + 12.0%$ $ \pm 2\rangle + 10.5%$ $ \pm 4\rangle$                        |
| 7          | <b>40.1%</b> $ \pm 3\rangle + 19.8%$ $ 0\rangle + 14.8%$ $ \pm 2\rangle + 12.6%$ $ \pm 1\rangle + 7.6%$ $ \pm 4\rangle$ |
| <b>Tb2</b> |                                                                                                                         |
| 1          | <b>95.7%</b> $ \pm 6\rangle + 3.5%$ $ \pm 4\rangle$                                                                     |
| 2          | <b>62.2%</b> $ \pm 5\rangle + 21.9%$ $ \pm 3\rangle + 10.2%$ $ \pm 1\rangle + 4.0%$ $ \pm 2\rangle + 1.9%$ $ 0\rangle$  |
| 3          | <b>35.4%</b> $ \pm 2\rangle + 34.8%$ $ \pm 4\rangle + 13.0%$ $ \pm 1\rangle + 13.0%$ $ 0\rangle + 3.1%$ $ \pm 6\rangle$ |
| 4          | <b>32.8%</b> $ \pm 5\rangle + 32.0%$ $ \pm 1\rangle + 18.7%$ $ \pm 3\rangle + 15.3%$ $ 0\rangle$                        |
| 5          | <b>59.3%</b> $ \pm 4\rangle + 30.5%$ $ \pm 2\rangle + 4.5%$ $ \pm 1\rangle + 3.5%$ $ 0\rangle$                          |
| 6          | <b>61.1%</b> $ 0\rangle + 27.0%$ $ \pm 2\rangle + 8.1%$ $ \pm 1\rangle + 2.0%$ $ \pm 5\rangle + 1.4%$ $ \pm 4\rangle$   |
| 7          | <b>58.1%</b> $ \pm 3\rangle + 32.0%$ $ \pm 1\rangle + 5.1%$ $ 0\rangle + 2.2%$ $ \pm 5\rangle + 2.2%$ $ \pm 2\rangle$   |

**Table S16.** SINGLE\_ANISO computed crystal field parameters for Tb1 and Tb2 centres in complex **3**. The major dominating values are kept in bold.

# Supporting Information

| <b>k</b> | <b>q</b> | $B_k^q$          | $B_k^q$          | $B_k^q$          | $B_k^q$          |
|----------|----------|------------------|------------------|------------------|------------------|
|          |          | <b>Complex 3</b> |                  | <b>Complex 4</b> |                  |
|          |          | <b>Tb1</b>       | <b>Tb2</b>       | <b>Dy1</b>       | <b>Dy2</b>       |
| <b>2</b> | -2       | <b>-0.11E+02</b> | <b>0.11E+02</b>  | <b>-0.36E+01</b> | <b>0.14E+01</b>  |
|          | -1       | 0.96E+01         | <b>0.19E+02</b>  | <b>-0.48E+01</b> | <b>-0.18E+02</b> |
|          | 0        | <b>-0.19E+02</b> | <b>-0.13E+02</b> | -0.88E+00        | -0.42E+00        |
|          | 2        | <b>-0.17E+02</b> | 0.97E+01         | <b>-0.13E+02</b> | <b>0.12E+02</b>  |
|          | 1        | 0.70E+01         | -0.89E+01        | <b>0.46E+01</b>  | 0.68E+00         |
| <b>4</b> | -4       | 0.77E+00         | <b>0.15E+01</b>  | 0.23E-01         | -0.17E+00        |
|          | -3       | <b>0.83E+01</b>  | <b>0.12E+01</b>  | 0.41E+00         | 0.47E-01         |
|          | -2       | <b>-0.16E+01</b> | 0.38E+00         | 0.91E-02         | -0.18E+00        |
|          | -1       | 0.39E+00         | 0.13E+00         | -0.93E-01        | -0.17E+00        |
|          | 0        | -0.31E+00        | -0.26E+00        | -0.12E-02        | 0.66E-03         |
|          | 1        | -0.64E+00        | 0.11E+00         | 0.83E-01         | 0.11E+00         |
|          | 2        | 0.10E+01         | -0.29E+00        | 0.25E-01         | -0.74E-01        |
|          | 3        | -0.40E+00        | 0.62E+01         | -0.52E+00        | 0.27E+00         |
|          | 4        | 0.35E+00         | 0.43E+00         | 0.79E-01         | 0.16E+00         |
| <b>6</b> | -6       | 0.33E-01         | -0.42E-01        | -0.85E-03        | 0.30E-02         |
|          | -5       | 0.87E-01         | 0.10E+01         | 0.54E-02         | -0.32E-02        |
|          | -4       | 0.79E-02         | -0.28E-01        | -0.44E-02        | -0.12E-02        |
|          | -3       | -0.53E+00        | -0.11E+00        | -0.48E-02        | -0.21E-02        |
|          | -2       | 0.24E+00         | -0.10E+00        | 0.27E-02         | -0.56E-02        |
|          | -1       | -0.58E-01        | 0.13E+00         | -0.17E-02        | -0.14E-03        |
|          | 0        | 0.19E-01         | 0.12E-01         | 0.16E-03         | -0.24E-03        |
|          | 1        | 0.10E+00         | 0.62E-01         | -0.65E-02        | 0.17E-03         |
|          | 2        | -0.14E+00        | 0.77E-01         | -0.20E-02        | -0.22E-02        |
|          | 3        | 0.23E-01         | -0.62E+00        | -0.50E-02        | -0.11E-01        |
|          | 4        | 0.91E-02         | -0.10E-01        | 0.42E-02         | 0.10E-02         |
|          | 5        | 0.10E+00         | -0.11E+01        | -0.74E-02        | -0.82E-03        |
|          | 6        | 0.33E+00         | -0.87E-01        | 0.64E-02         | 0.78E-02         |

# Supporting Information

**Table S17.** SINGLE\_ANISO computed wavefunction decomposition analysis for Dy1 and Dy2 centres in complex 4. The major dominating values are kept in bold.

| $\pm m_j$  | <i>wave function decomposition analysis</i>                                                                                                                            |
|------------|------------------------------------------------------------------------------------------------------------------------------------------------------------------------|
| <b>Dy1</b> |                                                                                                                                                                        |
| KD1        | <b>95.3%</b> $ \pm 15/2\rangle + 3.3\%$ $ \pm 9/2\rangle$                                                                                                              |
| KD2        | <b>89.7%</b> $ \pm 13/2\rangle + 4.4\%$ $ \pm 7/2\rangle + 3.1\%$ $ \pm 9/2\rangle$                                                                                    |
| KD3        | <b>72.2 %</b> $ \pm 11/2\rangle + 11.7\%$ $ \pm 9/2\rangle + 7.7\%$ $ \pm 5/2\rangle + 5.5\%$ $ \pm 3/2\rangle + 1.0 %$ $ \pm 13/2\rangle$                             |
| KD4        | <b>42.9%</b> $ \pm 7/2\rangle + 31.2\%$ $ \pm 9/2\rangle + 14.3\%$ $ \pm 1/2\rangle + 4.8\%$ $ \pm 11/2\rangle + 3.9\%$ $ \pm 5/2\rangle + 2.1\%$ $ \pm 3/2\rangle$    |
| KD5        | <b>40.9%</b> $ \pm 5/2\rangle + 20.6\%$ $ \pm 3/2\rangle + 18.2\%$ $ \pm 9/2\rangle + 8.6\%$ $ \pm 11/2\rangle + 3.6\%$ $ \pm 13/2\rangle + 2.5\%$ $ \pm 15/2\rangle$  |
| KD6        | <b>39.9%</b> $ \pm 3/2\rangle + 24.1\%$ $ \pm 1/2\rangle + 14.7\%$ $ \pm 9/2\rangle + 10.8\%$ $ \pm 7/2\rangle + 4.6\%$ $ \pm 11/2\rangle + 3.4\%$ $ \pm 5/2\rangle$   |
| KD7        | <b>55.6%</b> $ \pm 1/2\rangle + 14.0\%$ $ \pm 5/2\rangle + 12.3\%$ $ \pm 7/2\rangle + 11.7\%$ $ \pm 3/2\rangle + 3.5 %$ $ \pm 9/2\rangle + 2.1 %$ $ \pm 11/2\rangle$   |
| KD8        | <b>29%</b> $ \pm 5/2\rangle + 24.3\%$ $ \pm 7/2\rangle + 19.2\%$ $ \pm 3/2\rangle + 14.4\%$ $ \pm 9/2\rangle + 6.8\%$ $ \pm 11/2\rangle + 2.5\%$ $ \pm 13/2\rangle$    |
| <b>Dy2</b> |                                                                                                                                                                        |
| KD1        | <b>95.8 %</b> $ \pm 13/2\rangle + 1.1\%$ $ \pm 9/2\rangle + 0.9\%$ $ \pm 7/2\rangle$                                                                                   |
| KD2        | <b>87%</b> $ \pm 15/2\rangle + 7.7 %$ $ \pm 11/2\rangle + 1.9\%$ $ \pm 7/2\rangle + 1.7\%$ $ \pm 9/2\rangle + 0.9\%$ $ \pm 13/2\rangle$                                |
| KD3        | <b>73.8 %</b> $ \pm 11/2\rangle + 10.4\%$ $ \pm 9/2\rangle + 9.0\%$ $ \pm 15/2\rangle + 2.5\%$ $ \pm 5/2\rangle + 2.1 %$ $ \pm 1/2\rangle + 1.9 %$ $ \pm 3/2\rangle$   |
| KD4        | <b>37.2 %</b> $ \pm 7/2\rangle + 23.5\%$ $ \pm 9/2\rangle + 16.9\%$ $ \pm 1/2\rangle + 15.9\%$ $ \pm 5/2\rangle + 2.9\%$ $ \pm 11/2\rangle + 1.9\%$ $ \pm 15/2\rangle$ |
| KD5        | <b>46.5%</b> $ \pm 3/2\rangle + 22.3\%$ $ \pm 5/2\rangle + 11.5\%$ $ \pm 1/2\rangle + 9.8\%$ $ \pm 9/2\rangle + 8.9\%$ $ \pm 11/2\rangle$                              |
| KD6        | <b>33.8 %</b> $ \pm 9/2\rangle + 31.6\%$ $ \pm 1/2\rangle + 18.9\%$ $ \pm 5/2\rangle + 9.3\%$ $ \pm 3/2\rangle + 3.5\%$ $ \pm 11/2\rangle + 1.7\%$ $ \pm 13/2\rangle$  |
| KD7        | <b>41.5 %</b> $ \pm 7/2\rangle + 15.9\%$ $ \pm 1/2\rangle + 15.3\%$ $ \pm 9/2\rangle + 13.5\%$ $ \pm 3/2\rangle + 10.1 %$ $ \pm 5/2\rangle + 2.4 %$ $ \pm 11/2\rangle$ |
| KD8        | <b>28.9 %</b> $ \pm 5/2\rangle + 27.3\%$ $ \pm 3/2\rangle + 21.6\%$ $ \pm 1/2\rangle + 17.4\%$ $ \pm 7/2\rangle + 4.4\%$ $ \pm 9/2\rangle$                             |



# Supporting Information

**Table S18.** CASSCF computed low-lying 21 sextets spin-free and CASSCF+RASSI-SO computed low-lying 16 spin-orbit states for Dy1 and Dy2 centres in complex **4**. All the values are reported here in  $\text{cm}^{-1}$ .

| <b>Dy1</b>       |                   | <b>Dy2</b>       |                   |
|------------------|-------------------|------------------|-------------------|
| Spin-free states | Spin-orbit states | Spin-free states | Spin-orbit states |
| 0.00             | 0.00              | 0.00             | 0.00              |
| 29.2             | 37.9              | 15.2             | 28.3              |
| 83.9             | 91.8              | 15.2             | 77.0              |
| 113.0            | 126.4             | 61.9             | 112.2             |
| 126.7            | 186.2             | 119.4            | 139.3             |
| 294.4            | 343.9             | 146.3            | 205.6             |
| 297.6            | 412.1             | 198.6            | 261.7             |
| 434.3            | 616.9             | 213.8            | 525.5             |
| 451.7            | 2987.3            | 306.5            | 2983.9            |
| 746.0            | 3050.5            | 596.4            | 3040.2            |
| 754.1            | 3131.0            | 617.5            | 3076.6            |
| 7592.5           | 3218.7            | 7523.7           | 3131.4            |
| 7654.0           | 3264.0            | 7571.8           | 3161.9            |
| 7675.4           | 3321.9            | 7620.2           | 3236.9            |
| 7781.4           | 3413.9            | 7664.7           | 3349.8            |
| 7804.4           | 5583.0            | 7724.4           | 5561.9            |
| 7917.1           |                   | 7764.7           |                   |
| 7937.4           |                   | 7801.5           |                   |
| 34722.7          |                   | 34722.3          |                   |
| 35118.4          |                   | 34948.6          |                   |
| 35332.9          |                   | 35233.3          |                   |

# Supporting Information

**Table S19.** SINGLE\_ANISO computed g-values and the angle of deviation from ground state  $g_{zz}$  orientation of low-lying eight Kramers doublet for Dy1 and Dy2 centres in complex **4**.

| <b>Dy1</b>                         |                          |                            |
|------------------------------------|--------------------------|----------------------------|
| $\pm m_J$ states (from 21 sextets) | $g_{xx}; g_{yy}; g_{zz}$ | $\theta$ ( $^\circ$ angle) |
| 0.0                                | 0.2711; 0.4646; 19.4909  | 0                          |
| 37.9                               | 1.0920; 1.2247; 16.3284  | 2.3                        |
| 91.8                               | 1.7509; 2.4556; 13.5933  | 27.0                       |
| 126.4                              | 1.6625; 2.3431; 12.6605  | 50.8                       |
| 186.2                              | 3.6767; 4.7359; 10.0032  | 95.3                       |
| 343.9                              | 0.1163; 0.8720; 11.2841  | 94.3                       |
| 412.1                              | 0.3394; 0.7249; 12.8175  | 89.2                       |
| 616.9                              | 0.0001; 0.0025; 19.0224  | 65.2                       |
| <b>Dy2</b>                         |                          |                            |
| 0.0                                | 0.1464; 0.2623; 17.0718  | 0                          |
| 28.4                               | 0.0352; 0.0544; 19.1219  | 3.0                        |
| 77.0                               | 1.2246; 1.840; 14.9211   | 22.3                       |
| 112.2                              | 0.0946; 3.0390; 13.3048  | 56.4                       |
| 139.3                              | 1.1675; 1.2892; 9.3543   | 13.8                       |
| 205.6                              | 5.7329; 4.7225; 1.5599   | 90.0                       |
| 261.7                              | 1.9581; 6.3553; 11.9465  | 117.6                      |
| 525.5                              | 0.0039; 0.0106; 19.6458  | 101.1                      |

**Table S20.** CASSCF computed g-tensors and D values for Ni1 and Ni2 sites in complexes **1, 3-4**.

|                                               | <b>1</b> |        | <b>3</b> |        | <b>4</b> |        |
|-----------------------------------------------|----------|--------|----------|--------|----------|--------|
|                                               | Ni1      | Ni2    | Ni1      | Ni2    | Ni1      | Ni2    |
| $g_x$                                         | 2.281    | 2.280  | 2.272    | 2.280  | 2.269    | 2.281  |
| $g_y$                                         | 2.295    | 2.293  | 2.284    | 2.293  | 2.289    | 2.295  |
| $g_z$                                         | 2.335    | 2.333  | 2.330    | 2.333  | 2.332    | 2.332  |
| D                                             | -7.321   | -7.509 | -7.509   | -7.509 | -7.280   | -7.280 |
| E/D                                           | 0.171    | 0.126  | 0.126    | 0.126  | 0.173    | 0.173  |
| Energies of three low lying Spin-Orbit states |          |        |          |        |          |        |
|                                               | 0.000    | 0.000  | 0.000    | 0.000  | 0.000    | 0.000  |
|                                               | 2.518    | 1.893  | 1.893    | 1.893  | 2.531    | 2.531  |
|                                               | 8.580    | 8.456  | 8.456    | 8.456  | 8.547    | 8.546  |
| g-tensors with pseudo spin = 1/2              |          |        |          |        |          |        |
| $g_x$                                         | 0.000    | 0.000  | 0.000    | 0.000  | 0.000    | 0.000  |
| $g_y$                                         | 0.000    | 0.000  | 0.000    | 0.000  | 0.000    | 0.000  |
| $g_z$                                         | 4.6707   | 4.6661 | 4.6608   | 4.6661 | 4.6655   | 4.6653 |

# Supporting Information

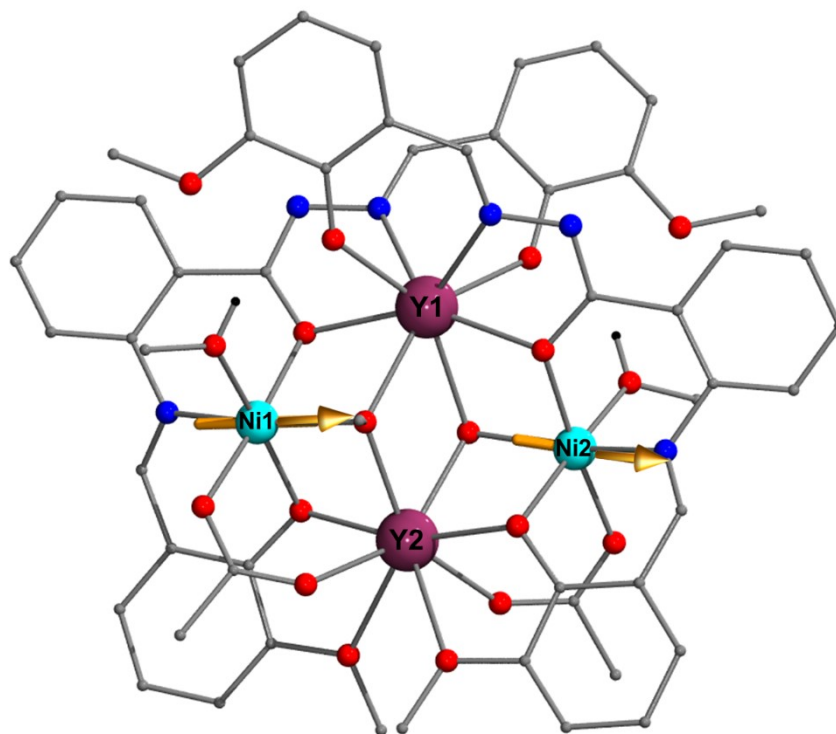

**Figure S17.** Orientation of  $D_{zz}$  axes on Ni1 and Ni2 centers in complex 1.

# Supporting Information

**Table S21.** The exchange spectrum for **3** and for **4** generated from POLY\_ANISO simulation of magnetic susceptibility data along with the associated  $g_{zz}$  and tunnel splitting ( $\Delta_{tun}$ ) values.

| Complex 3         |                         |          |                | Complex 4               |          |                |
|-------------------|-------------------------|----------|----------------|-------------------------|----------|----------------|
| Exchange doublets | Energy/cm <sup>-1</sup> | $g_{zz}$ | $\Delta_{tun}$ | Energy/cm <sup>-1</sup> | $g_{zz}$ | $\Delta_{tun}$ |
| 1                 | 0.0                     | 44.333   | 1.8E-05        | 0.000                   | 41.660   | 7.3E-05        |
| 2                 | 5.718                   | 8.405    | 3.0E-05        | 1.717                   | 13.349   | 4.0E-04        |
| 3                 | 9.824                   | 0.259    | 9.5E-03        | 4.161                   | 33.969   | 3.2E-04        |
| 4                 | 9.863                   | 0.257    | 8.1E-03        | 4.162                   | 13.313   | 1.2E-04        |
| 5                 | 10.218                  | 0.242    | 9.2E-04        | 4.379                   | 13.308   | 4.2E-04        |
| 6                 | 10.257                  | 0.240    | 9.6E-03        | 4.381                   | 14.064   | 3.0E-04        |
| 7                 | 14.532                  | 8.686    | 1.1E-05        | 7.043                   | 27.672   | 3.3E-04        |
| 8                 | 19.910                  | 26.206   | 1.9E-04        | 8.322                   | 37.893   | 1.0E-04        |
| 9                 | 116.041                 | 29.543   | 3.2E-03        | 9.367                   | 37.893   | 4.0E-05        |
| 10                | 123.389                 | 0.249    | 1.7E-02        | 9.393                   | 37.905   | 3.7E-05        |
| 11                | 123.434                 | 0.246    | 2.4E-02        | 10.367                  | 12.123   | 8.6E-05        |
| 12                | 130.325                 | 6.422    | 3.5E-03        | 10.398                  | 12.133   | 5.8E-05        |
| 13                | 132.877                 | 23.611   | 3.5E-03        | 13.042                  | 12.478   | 1.2E-04        |
| 14                | 139.741                 | 0.249    | 2.4E-02        | 13.049                  | 12.479   | 5.2E-05        |
| 15                | 139.786                 | 0.247    | 1.7E-02        | 13.534                  | 30.850   | 2.6E-04        |
| 16                | 147.106                 | 11.624   | 3.2E-03        | 13.549                  | 30.834   | 1.8E-04        |
| 17                | 175.461                 | 40.301   | 5.8E-03        | 18.760                  | 34.140   | 5.0E-05        |
| 18                | 180.923                 | 3.029    | 1.0E-03        | 19.047                  | 11.079   | 3.8E-04        |
| 19                | 183.356                 | 0.216    | 2.0E-01        | 28.191                  | 44.112   | 1.6E-06        |
| 20                | 183.690                 | 0.221    | 1.6E-01        | 30.066                  | 13.768   | 4.8E-05        |
| 21                | 184.171                 | 0.207    | 1.6E-01        | 32.551                  | 36.849   | 4.8E-05        |
| 22                | 184.506                 | 0.211    | 2.0E-01        | 32.552                  | 36.852   | 1.3E-05        |
| 23                | 187.065                 | 11.312   | 8.0E-03        | 32.824                  | 12.727   | 5.2E-05        |
| 24                | 192.271                 | 22.240   | 6.2E-03        | 32.826                  | 12.726   | 5.8E-05        |
| 25                | 291.451                 | 25.305   | 1.0E-01        | 35.583                  | 12.901   | 6.4E-05        |
| 26                | 296.857                 | 0.225    | 7.9E-02        | 36.910                  | 29.793   | 2.7E-05        |
| 27                | 297.735                 | 0.224    | 1.4E-01        | 37.680                  | 40.223   | 3.3E-05        |
| 28                | 302.707                 | 2.519    | 1.1E-01        | 37.698                  | 40.235   | 1.8E-06        |
| 29                | 308.268                 | 19.479   | 1.1E-01        | 38.075                  | 38.750   | 1.5E-04        |
| 30                | 313.219                 | 0.225    | 1.4E-01        | 38.765                  | 12.178   | 1.9E-06        |

# Supporting Information

|    |         |       |         |        |        |         |
|----|---------|-------|---------|--------|--------|---------|
| 31 | 314.097 | 0.225 | 8.0E-02 | 38.788 | 12.191 | 3.3E-05 |
| 32 | 319.484 | 7.657 | 1.0E-01 | 39.561 | 12.302 | 1.1E-03 |

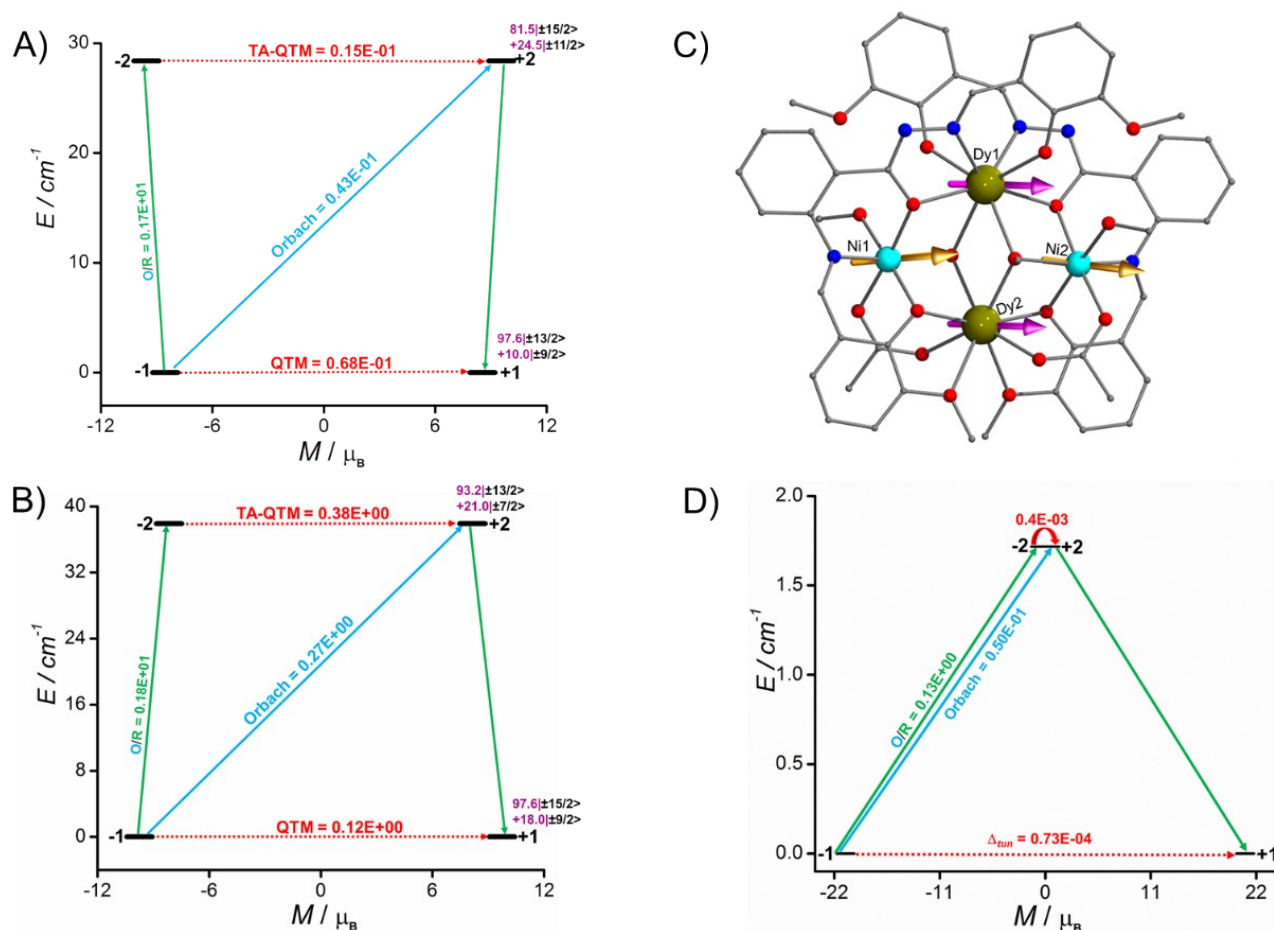

**Figure S18.** A) SINGLE\_ANISO computed ab initio blockade barrier for Dy1 in complex 4; B) for Dy2 site in complex 4; C) ab initio computed orientation of ground state anisotropy axis on each of the metal centres; D) exchange states obtained from POLY\_ANISO simulation. Energy spectrum are arranged on the diagram according to the associated magnetic moment. Red dotted arrows and numbers represent the possibility of quantum tunnelling between KDs while green and sky blue arrows and numbers represent the possibility of Orbach and Orbach/Raman relaxations.

# Supporting Information

## X-ray structure analysis of H<sub>3</sub>L:

The solid-state structure analysis reveal that H<sub>3</sub>L possessed non planar architecture with quinazoline ring (Figure S19).<sup>S1</sup> The heterocyclic quinazoline ring contain one keto group [C9=O3, 1.220(2) Å], hydrazo group [N2-N1, 1.374 (2) Å] linked with o-vanilin, and a sp<sup>3</sup>-hybridized carbon (C16) linked with 2-hydroxy-3-methoxybenzaldehyde moiety (Figure S19). One of the amine nitrogen (N3) of the heterocyclic quinazoline ring, is attached with proton.<sup>S1</sup>

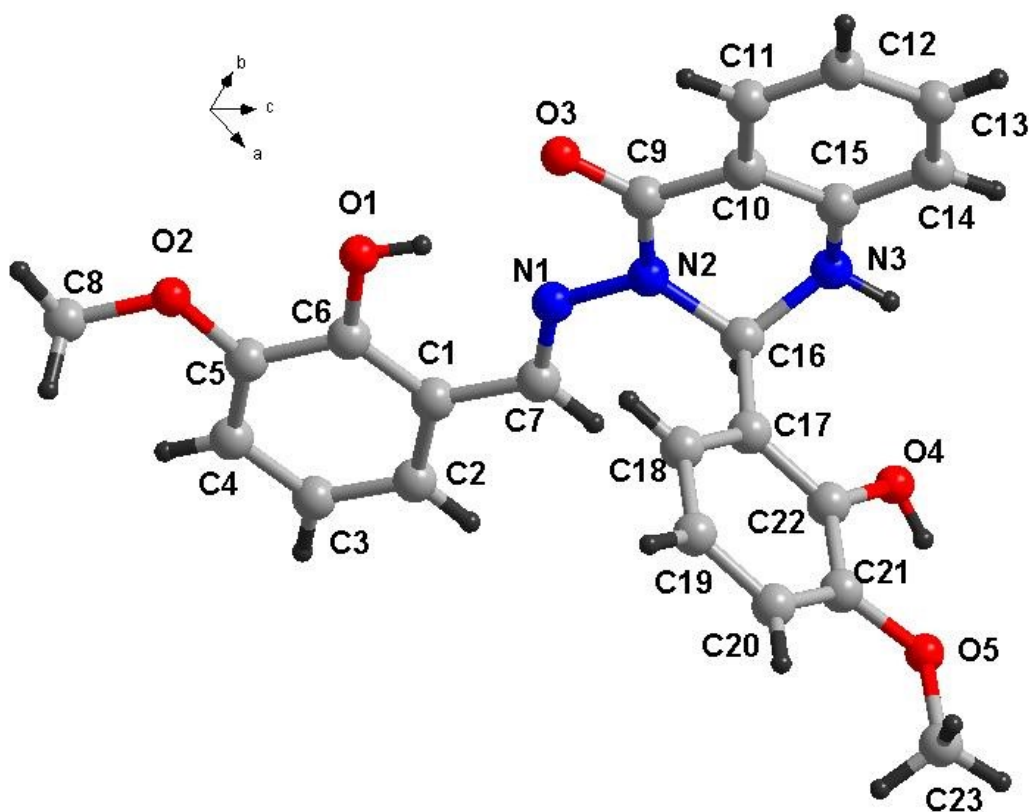

Figure S19. Solid-state molecular structure of H<sub>3</sub>L.

## References:

S1. K. B. Gudasi, S. A. Patil, R. S. Vadavi, R. V. Shenoy and M. Nethaji, *Transition Met. Chem.*, 2006, **31**, 586.
